# Supplementary material for: The Metagenome of an Anaerobic Microbial Community Decomposing Poplar Wood Chips
Source: PLoS One. 2012 May 21;7(5):e36740. doi: 10.1371/journal.pone.0036740 (PMC3357426; doi:10.1371/journal.pone.0036740)
Supplement: File S1 — GHases and LO overview. IMG/M and CAZY/FOLY identifiers for putative glycoside hydrolases and lignin oxidizing enzymes identified among the metagenome of the microbial community decaying poplar wood chips. (XLS) [file pone.0036740.s004.xls]

## Sheet: Sheet1
IMG/M ID	CAZy/FOLy family ID	Best Blast hit accession number	Score	E value	Family
2049009894	PBDCA2_80180	EAA62552.1	70.5	4e-12	GH92
2049017059	PBDCA2_231340	ABR44845.1	496	6e-140	GH78
2049019686	PBDCA2_292040	ACK42813.1	124	5e-29	GH2
2049020042	PBDCA2_300270	ABN52453.1	105	3e-23	GH94/GT84
2049020755	PBDCA2_310540	ABY92024.1	139	5e-33	GH23
2049024609	PBDCA2_393070	CAZ29389.1	76.3	2e-14	GH99
2049026767	PBDCA2_440650	ABR36880.1	156	2e-38	GH94/GT84
2049029342	PBDCA2_493860	ABG86305.1	82.8	2e-16	GH13
2049030629	PBDCA2_524130	ACJ72869.1	186	2e-47	LO2
2049031494	PBDCA2_537530	ABD82186.1	237	1e-62	GH5
2049033456	PBDCA2_579110	ACL77529.1	82	7e-16	GH43
2049036052	PBDCA2_638850	ABN53393.1	150	7e-37	GH13
2049037084	PBDCA2_656490	ABS22505.1	69.3	6e-12	GH18
2049037309	PBDCA2_662810	ACJ72869.1	212	3e-55	LO2
2049038372	PBDCA2_685870	ACI97953.1	67.4	1e-11	GH13
2049038727	PBDCA2_691200	EAA62552.1	73.2	4e-13	GH92
2049043529	PBDCA2_797970	ABP45478.1	130	1e-30	GH18/GH5
2049044492	PBDCA2_815510	CAI43283.4	91.3	1e-18	LDA6
2049045421	PBDCA2_837130	ABJ81212.1	68.2	5e-12	GH9
2049048060	PBDCA2_891330	ABJ85962.1	190	1e-48	GH3
2049049375	PBDCA2_917320	ABR38697.1	858	0	GH97
2049050048	PBDCA2_934960	ACB74631.1	146	2e-35	GH106
2049051211	PBDCA2_956730	EAX23953.1	78.2	5e-15	GH109
2049051758	PBDCA2_971560	AAU84238.1	76.3	2e-14	GH38
2049056031	PBDCA2_1063730	ACM51845.1	127	8e-30	GH3
2049056737	PBDCA2_1076060	ACJ72869.1	254	9e-68	LO2
2049057153	PBDCA2_1087300	ACJ72869.1	184	7e-47	LO2
2049058306	PBDCA2_1108280	ABQ07945.1	362	4e-100	GH5
2049060595	PBDCA2_1159650	BAE55581.1	89.7	2e-18	LDA6
2049062244	PBDCA2_1194140	ABJ82128.1	284	9e-77	GH88
2049066816	PBDCA2_1292690	ACJ32917.1	115	2e-26	GH51
2049069839	PBDCA2_1357330	CAZ29389.1	87.8	7e-18	GH99
2049081669	PBDCA2_1604950	NP_521799.1	78.2	5e-15	GH13
2049083665	PBDCA2_1648330	ABP67154.1	147	6e-36	GH4
2049086042	PBDCA2_1702120	P56216.1	118	4e-27	LDA2
2049090814	PBDCA2_1799140	ACI99033.1	106	2e-23	GH23
2049093416	PBDCA2_1858350	ABY92024.1	73.6	1e-13	GH23
2049095057	PBDCA2_1892470	BAG21593.1	79.7	2e-15	GH16
2049095538	PBDCA2_1902490	ABJ82128.1	127	8e-30	GH88
2049099560	PBDCA2_1983600	CAJ68298.1	134	1e-31	GH18
2049101787	PBDCA2_2032640	ABJ83649.1	240	1e-63	GH3
2049104295	PBDCA2_2090140	AAX35883.1	99.4	2e-21	GH3
2049105038	PBDCA2_2100490	ACB74639.1	95.9	2e-20	GH43/GH95
2049107604	PBDCA2_2158240	NP_563254.1	64.7	5e-11	GH77
2049110191	PBDCA2_2209540	ABN52453.1	72.4	3e-13	GH94/GT84
2049110865	PBDCA2_2225710	ACL77529.1	203	1e-52	GH43
2049115276	PBDCA2_2320390	ABW19905.1	126	1e-29	GH3
2049116343	PBDCA2_2341290	ABD07562.1	214	5e-56	GH17/GT2
2049120269	PBDCA2_2425240	ABB27973.1	73.2	2e-13	GH24
2049131359	PBDCA2_2662940	ACJ72869.1	115	3e-26	LO2
2049138043	PBDCA2_2804410	CAN65674.1	124	9e-29	GH28
2049140324	PBDCA2_2853530	ABL80445.1	79.3	2e-15	GH23
2049143949	PBDCA2_2930070	ABZ73922.1	107	1e-23	GH16
2049147039	PBDCA2_2994070	CAJ67194.1	77	1e-14	GH23
2049147391	PBDCA2_3003150	ACL69175.1	77	1e-14	GH94
2049153928	PBDCA2_3139020	NP_469498.1	64.3	8e-11	GH18
2049154474	PBDCA2_3153680	BAF87299.1	150	7e-37	GH5
2049160620	PBDCA2_3278710	ACR76042.1	80.9	3e-15	GH73
2049160844	PBDCA2_3284010	ABO49988.1	173	2e-43	GH13
2049164352	PBDCA2_3358830	EAA62552.1	70.9	1e-12	GH92
2049164417	PBDCA2_3360460	ABZ69365.1	173	2e-43	GH18/GT2/CE4
2049172697	PBDCA2_3540620	ABX42289.1	136	1e-32	GH112
2049174509	PBDCA2_3578810	BAE68425.1	95.9	3e-20	GH35
2049177306	PBDCA2_3635380	ABJ87525.1	214	8e-56	GH57
2049177819	PBDCA2_3649080	ABN52453.1	177	8e-45	GH94/GT84
2049178587	PBDCA2_3660110	AAX16429.1	271	2e-72	GH16
2049181615	PBDCA2_3730150	ACL77529.1	141	4e-34	GH43
2049181871	PBDCA2_3732710	ACA17060.1	106	1e-23	GH13
2049185194	PBDCA2_3805990	ACJ76364.1	130	6e-31	GH3
2049191749	PBDCA2_3942030	ACL69175.1	183	1e-46	GH94
2049192746	PBDCA2_3961360	AAZ97257.1	79.3	3e-15	GH94/GT84
2049192778	PBDCA2_3961680	XP_331443.1	66.6	1e-11	GH93
2049194264	PBDCA2_3996900	ACH37165.1	121	5e-28	GH13
2049196289	PBDCA2_4036960	NP_812984.1	80.5	1e-15	GH92
2049197317	PBDCA2_4061580	ACL69174.1	77.8	8e-15	GH81
2049197415	PBDCA2_4064220	CAN65674.1	108	5e-24	GH28
2049197737	PBDCA2_4071470	ACH37164.1	97.8	7e-21	GH57
2049199791	PBDCA2_4112160	ABS69644.1	117	1e-26	GH17/GT2
2049201975	PBDCA2_4157120	ACA38652.1	83.6	3e-16	GH73
2049206671	PBDCA2_4261520	ACM61440.1	107	1e-23	GH2
2049207833	PBDCA2_4284050	CAH00655.1	85.5	3e-17	LO3
2049208188	PBDCA2_4293490	ABQ04433.1	82.8	2e-16	GH65
2049209956	PBDCA2_4331320	ABJ84437.1	149	2e-36	GH29
2049210758	PBDCA2_4343460	ACI99508.1	294	2e-79	GH13/GH77
2049212466	PBDCA2_4380830	ACJ72867.1	66.6	1e-11	LO2
2049213016	PBDCA2_4393720	ABR37905.1	67.4	1e-11	GH28
2049213498	PBDCA2_4406640	ABG05513.1	92.8	2e-19	GH92
2049215460	PBDCA2_4449220	ACH37167.1	115	2e-26	GH13
2049217594	PBDCA2_4492890	ACL77700.1	109	2e-24	GH94
2049217658	PBDCA2_4493530	ACG79338.1	135	3e-32	GH3
2049218723	PBDCA2_4517330	ABZ70961.1	242	3e-64	GH3
2049224285	PBDCA2_4637710	CAD60736.1	117	6e-27	LO3
2049229832	PBDCA2_4756040	ACO33646.1	143	1e-34	GH13
2049230346	PBDCA2_4762850	BAD63185.1	64.7	7e-11	GH18
2049230955	PBDCA2_4776080	AAZ27784.1	65.9	6e-11	GH16
2049232308	PBDCA2_4803060	CAJ73819.1	674	0	GH13
2049232340	PBDCA2_4803670	ABR39657.1	442	1e-123	GH28
2049233726	PBDCA2_4836950	ABY92063.1	110	9e-25	GH66
2049234241	PBDCA2_4844340	CAH06255.1	178	8e-45	GH31
2049241909	PBDCA2_5010030	ABG82552.1	102	4e-22	GH95
2049242069	PBDCA2_5014560	ABX44209.1	222	3e-58	GH10/CE15
2049243617	PBDCA2_5045550	ABE34640.1	294	8e-80	GH13
2049247951	PBDCA2_5140390	EAA63395.1	81.3	6e-16	GH2
2049248143	PBDCA2_5142310	ACH38699.1	108	3e-24	GH13
2049248533	PBDCA2_5147380	ACL75611.1	113	1e-25	GH51
2049251105	PBDCA2_5206350	AAZ81556.1	83.6	1e-16	GH73
2049257437	PBDCA2_5336410	DAA01338.1	424	6e-118	GH20
2049263397	PBDCA2_5464890	ACB75560.1	68.2	8e-12	GH106/CE15
2049263845	PBDCA2_5476940	ABC24094.1	145	3e-35	GH3
2049264101	PBDCA2_5482330	ACM22959.1	119	1e-27	GH94
2049268058	PBDCA2_5562250	BAA22081.1	74.3	7e-14	GH94
2049274269	PBDCA2_5696010	CAG81278.1	87	1e-17	LO3
2049275921	PBDCA2_5729660	CAN65674.1	104	9e-23	GH28
2049279040	PBDCA2_5794220	ABP93305.1	110	2e-24	GH3
2049282134	PBDCA2_5863640	ACL74811.1	120	7e-28	GH5
2049283198	PBDCA2_5886060	EAL19727.1	100	1e-21	LO1
2049284612	PBDCA2_5913980	CAN97339.1	149	4e-36	GH13
2049284998	PBDCA2_5924540	ACL74721.1	111	5e-25	GH15
2049285610	PBDCA2_5938340	ACJ72869.1	118	3e-27	LO2
2049286862	PBDCA2_5964070	ABW01842.1	79.3	3e-15	GH63
2049288956	PBDCA2_6009870	ABX42705.1	155	2e-38	GH13
2049289830	PBDCA2_6023460	ACB76343.1	100	1e-21	GH78
2049294710	PBDCA2_6130510	ACH69873.1	70.9	8e-13	GH5
2049295417	PBDCA2_6144050	ABS69642.1	176	1e-44	GH17
2049296090	PBDCA2_6161970	ACL75382.1	108	5e-24	GH95
2049297449	PBDCA2_6188290	ABJ81232.1	283	2e-76	GH13
2049299309	PBDCA2_6228620	CAN65674.1	80.1	1e-15	GH28
2049300627	PBDCA2_6254400	ABR39461.1	125	6e-29	GH2
2049301623	PBDCA2_6279890	NP_812428.1	148	4e-36	GH43
2049302812	PBDCA2_6302700	BAA09831.1	68.6	5e-12	GH18
2049307810	PBDCA2_6407880	ABJ81420.1	140	2e-33	GH23
2049309068	PBDCA2_6435170	ACC72072.1	127	1e-29	GH23
2049310448	PBDCA2_6469010	CAN65674.1	90.1	1e-18	GH28
2049311450	PBDCA2_6486330	ACR74768.1	82.4	6e-16	GH53
2049311965	PBDCA2_6500120	CAB97423.1	68.2	5e-12	GH23
2049315049	PBDCA2_6562930	CAP71052.1	68.6	8e-12	LO1
2049316464	PBDCA2_6591540	ACN28438.1	122	4e-28	GH28
2049316785	PBDCA2_6600040	ABO49988.1	129	3e-30	GH13
2049324157	PBDCA2_6758550	AAA23230.1	161	7e-40	GH5
2049327953	PBDCA2_6841060	CAP85801.1	71.2	7e-13	LO3
2049328178	PBDCA2_6845590	ACI99508.1	149	1e-36	GH13/GH77
2049329718	PBDCA2_6877440	ABG59665.1	140	8e-34	GH13
2049333897	PBDCA2_6962660	NP_108444.1	69.3	2e-12	GH94/GT84
2049333929	PBDCA2_6962980	ABJ82128.1	92.8	2e-19	GH88
2049334218	PBDCA2_6967890	ABF41111.1	155	5e-38	GH3
2049334250	PBDCA2_6968780	ACR19007.1	128	5e-30	GH78
2049335534	PBDCA2_6999240	CAF23830.1	99.8	2e-21	GH13
2049336337	PBDCA2_7015080	CAP67702.1	92.4	5e-19	LDA6
2049337623	PBDCA2_7040750	NP_635529.1	829	0	GH13
2049343476	PBDCA2_7168510	NP_419921.1	161	3e-40	GH3
2049345601	PBDCA2_7215990	ACI19983.1	83.2	2e-16	GH78
2049345761	PBDCA2_7220300	ACL77529.1	126	2e-29	GH43
2049351397	PBDCA2_7339450	ACJ72869.1	132	2e-31	LO2
2049355067	PBDCA2_7416420	ACJ72869.1	83.6	1e-16	LO2
2049355615	PBDCA2_7425710	CAN65674.1	129	5e-30	GH28
2049356001	PBDCA2_7435910	ACJ72869.1	214	5e-56	LO2
2049356642	PBDCA2_7452050	NP_521799.1	149	2e-36	GH13
2049358000	PBDCA2_7480110	XP_331443.1	68.2	6e-12	GH93
2049360737	PBDCA2_7533690	XP_331443.1	171	2e-42	GH93
2049363018	PBDCA2_7584500	ABQ06535.1	294	8e-80	GH3
2049363923	PBDCA2_7604310	CAQ46175.1	79.3	2e-15	GH92
2049367522	PBDCA2_7679650	ABJ83699.1	88.6	4e-18	GH23
2049373095	PBDCA2_7795540	ABR44771.1	182	1e-45	GH43
2049375855	PBDCA2_7859790	ACA82189.1	164	6e-41	GH13
2049376784	PBDCA2_7874630	EAA61743.1	107	8e-24	GH31
2049380489	PBDCA2_7955060	ABI18350.1	107	1e-23	GH1
2049385535	PBDCA2_8061540	CAA68542.1	156	7e-38	GH32
2049385794	PBDCA2_8068380	ACL75113.1	182	2e-46	GH9
2049388881	PBDCA2_8134190	ABO49988.1	97.4	7e-21	GH13
2049389849	PBDCA2_8157030	ACL75914.1	119	2e-27	GH73
2049394358	PBDCA2_8250040	CAN60684.1	76.3	1e-13	GH18
2049395520	PBDCA2_8280190	ABL79814.1	171	4e-43	GH13
2049398742	PBDCA2_8346690	ABF52968.1	80.9	8e-16	GH103
2049404324	PBDCA2_8466300	ABG03051.1	128	3e-30	GH38
2049410060	PBDCA2_8587600	CAN65674.1	77	1e-14	GH28
2049415873	PBDCA2_8705430	ABF46302.1	102	1e-21	GH1
2049418098	PBDCA2_8755020	ABC20109.1	184	9e-47	GH13
2049427773	PBDCA2_8965030	CAM64300.1	82.8	2e-16	GH38
2049428834	PBDCA2_8985720	CAD60605.1	88.6	7e-18	LDA6
2049431920	PBDCA2_9049180	ACB76497.1	121	1e-27	GH97
2049432753	PBDCA2_9071280	CAP49255.1	65.1	4e-11	LO3
2049442524	PBDCA2_9274690	BAB49516.1	115	8e-26	GH23
2049447043	PBDCA2_9375430	ABX42169.1	73.6	1e-13	GH18
2049448879	PBDCA2_9415360	BAD62954.1	168	3e-42	GH4
2049454490	PBDCA2_9534210	ACJ72869.1	102	3e-22	LO2
2049456896	PBDCA2_9581880	ABJ83670.1	101	6e-22	GH10
2049457216	PBDCA2_9590620	ABV32788.1	156	3e-38	GH42
2049458114	PBDCA2_9611440	ACL76655.1	64.7	5e-11	GH10
2049460530	PBDCA2_9660360	ABY94171.1	194	7e-50	GH94/GT84
2049463907	PBDCA2_9731770	CAA75722.1	70.9	9e-13	LDA2
2049467120	PBDCA2_9801990	BAF60409.1	81.3	7e-16	GH57
2049473455	PBDCA2_9938840	ABJ81884.1	75.1	4e-14	GH94/GT84
2049475939	PBDCA2_9990200	ABJ81155.1	69.7	2e-12	GH18
2049476165	PBDCA2_9992780	CAI79477.1	199	1e-50	GH10
2049477805	PBDCA2_10029090	ABE63313.1	94	8e-20	GH94/GT84
2049479474	PBDCA2_10065900	AAL67138.1	111	4e-25	GH94
2049480932	PBDCA2_10099830	BAG21593.1	65.9	3e-11	GH16
2049484504	PBDCA2_10176260	ABV42203.1	76.6	1e-14	GH4
2049487569	PBDCA2_10239050	CAN65674.1	110	8e-25	GH28
2049491401	PBDCA2_10321390	ACL76655.1	119	2e-27	GH10
2049494900	PBDCA2_10396290	ABY92024.1	84.3	9e-17	GH23
2049497157	PBDCA2_10444320	AAZ55924.1	112	3e-25	GH13
2049499735	PBDCA2_10496550	ABQ91971.1	72.4	3e-13	GH20
2049499960	PBDCA2_10502830	ACD04696.1	109	2e-24	GH105
2049500089	PBDCA2_10506060	ACO31778.1	112	4e-25	GH92
2049501833	PBDCA2_10543040	ACB77493.1	169	2e-42	GH94
2049503833	PBDCA2_10586520	EAA63677.1	65.9	3e-11	GH1/GH95
2049508277	PBDCA2_10677100	XP_331443.1	70.1	1e-11	GH93
2049510179	PBDCA2_10717100	ABP71312.1	71.2	1e-12	GH16
2049510821	PBDCA2_10734450	ACR10686.1	132	3e-31	GH3
2049511404	PBDCA2_10748200	CAN65674.1	95.1	4e-20	GH28
2049512082	PBDCA2_10758040	ABX02948.1	198	8e-51	GH9
2049514177	PBDCA2_10804560	ABQ91109.1	176	3e-44	GH94/GT84
2049515722	PBDCA2_10835830	ACS39698.1	191	4e-49	GH15
2049518976	PBDCA2_10904430	ACK41762.1	309	1e-83	GH1
2049522936	PBDCA2_10988650	ABR44729.1	112	6e-25	GH2
2049523768	PBDCA2_11010470	ABJ81713.1	110	6e-25	GH50
2049529217	PBDCA2_11126340	ACL77529.1	67.4	9e-12	GH43
2049530213	PBDCA2_11143690	ABR44885.1	125	3e-29	GH63
2049530727	PBDCA2_11157320	ACO34516.1	105	5e-23	GH106
2049532302	PBDCA2_11189860	ABS01610.1	66.6	3e-11	GH78
2049535648	PBDCA2_11259430	BAF02587.1	77.8	1e-14	GH18
2049539630	PBDCA2_11346110	ABR43370.1	158	3e-39	GH92
2049542372	PBDCA2_11400210	CAN97777.1	195	7e-50	GH35
2049542404	PBDCA2_11400980	ACI19833.1	121	4e-28	GH28
2049547678	PBDCA2_11513210	CAJ85791.1	108	6e-24	LDA6
2049550569	PBDCA2_11579620	ACQ82286.1	97.1	1e-20	GH5
2049560168	PBDCA2_11777400	ACN28438.1	94.4	9e-20	GH28
2049561228	PBDCA2_11804860	ABW17626.1	80.9	9e-16	GH39
2049561324	PBDCA2_11807130	ACE82897.1	92.8	2e-19	GH3
2049561646	PBDCA2_11810710	NP_243094.1	147	8e-36	GH4
2049562933	PBDCA2_11840030	ABM14300.1	187	6e-48	GH18/GH5
2049565600	PBDCA2_11892090	ACC84007.1	182	5e-46	GH13
2049566466	PBDCA2_11914600	ACO45909.1	100	9e-22	GH20
2049568235	PBDCA2_11952560	ABX31549.1	76.3	2e-14	GH36
2049569136	PBDCA2_11967330	ABY40380.1	112	1e-24	GH18
2049571544	PBDCA2_12022070	XP_331443.1	72.4	4e-13	GH93
2049572059	PBDCA2_12035390	ABQ03812.1	70.1	1e-12	GH31
2049572187	PBDCA2_12036670	ABJ88246.1	103	8e-23	GH13
2049581771	PBDCA2_12237900	BAB49516.1	118	1e-26	GH23
2049582095	PBDCA2_12246510	ABQ06879.1	102	2e-22	GH8
2049584564	PBDCA2_12301460	CAN65674.1	89	3e-18	GH28
2049584854	PBDCA2_12304370	ABJ84616.1	98.2	5e-21	GH51
2049586690	PBDCA2_12342860	ABR39832.1	84.3	8e-17	GH2
2049587203	PBDCA2_12353720	NP_864910.1	70.5	2e-12	GH43
2049591123	PBDCA2_12438890	CAZ28708.1	88.2	7e-18	GH84
2049597340	PBDCA2_12569230	ABX43817.1	68.9	3e-12	GH73
2049601010	PBDCA2_12646020	ABV32788.1	495	2e-139	GH42
2049602368	PBDCA2_12679250	ABJ83668.1	142	2e-34	GH3
2049603425	PBDCA2_12701110	XP_331443.1	103	1e-22	GH93
2049604067	PBDCA2_12716560	ACH37167.1	163	1e-40	GH13
2049604099	PBDCA2_12716880	ABE63313.1	157	1e-38	GH94/GT84
2049605548	PBDCA2_12748010	ABQ06130.1	174	5e-44	GH51
2049607314	PBDCA2_12785830	CAI79477.1	94.7	5e-20	GH10
2049608087	PBDCA2_12797660	NP_623660.1	79.7	1e-14	GH23
2049608671	PBDCA2_12812520	ABF80141.1	186	2e-47	GH94/GT84
2049621664	PBDCA2_13091510	ABX41163.1	113	1e-25	GH88
2049629440	PBDCA2_13252380	ACM22556.1	192	2e-48	GH31
2049629857	PBDCA2_13262980	ABQ07432.1	160	1e-39	GH65
2049631882	PBDCA2_13306940	BAE44527.1	78.2	5e-15	GH74
2049633169	PBDCA2_13332340	ABR39485.1	165	3e-41	GH2
2049637422	PBDCA2_13426580	ABN52488.1	138	3e-33	GH3
2049637614	PBDCA2_13431450	ABR33414.1	137	6e-33	GH42
2049640059	PBDCA2_13479140	ABZ70671.1	79	3e-15	GH29
2049643015	PBDCA2_13547360	ACL77529.1	152	3e-37	GH43
2049644302	PBDCA2_13572140	ACL76673.1	285	3e-77	GH5
2049644334	PBDCA2_13573010	ABK43903.1	191	4e-49	GH13
2049645972	PBDCA2_13607150	EAA62552.1	79.7	3e-15	GH92
2049647684	PBDCA2_13642590	CAN65674.1	147	2e-35	GH28
2049648452	PBDCA2_13662160	ACJ72869.1	118	3e-27	LO2
2049650438	PBDCA2_13701980	AAK80693.1	135	3e-32	GH18
2049650534	PBDCA2_13702940	ACJ72869.1	65.1	4e-11	LO2
2049651017	PBDCA2_13712640	ACN28438.1	137	2e-32	GH28
2049652047	PBDCA2_13738370	CAP85801.1	78.2	5e-15	LO3
2049652563	PBDCA2_13744300	ABD81904.1	80.5	5e-15	GH50
2049653114	PBDCA2_13759100	ACM06887.1	80.5	1e-15	GH23
2049653915	PBDCA2_13776950	ACK73075.1	78.6	4e-15	GH13
2049659002	PBDCA2_13887160	ACL76655.1	71.2	7e-13	GH10
2049663968	PBDCA2_13991020	ABY92024.1	108	5e-24	GH23
2049667989	PBDCA2_14078930	ABV42383.1	104	6e-23	GH94/GT84
2049668377	PBDCA2_14083880	ACL72836.1	81.6	5e-16	GH3
2049672053	PBDCA2_14160670	NP_889400.1	76.3	2e-14	GH13
2049672729	PBDCA2_14176940	CAG81278.1	68.9	6e-12	LO3
2049675113	PBDCA2_14230310	ACR73943.1	91.3	6e-19	GH112
2049677625	PBDCA2_14278020	AAW39696.1	121	4e-28	GH25
2049678719	PBDCA2_14306420	CAQ01160.1	144	5e-35	GH13
2049679300	PBDCA2_14313480	CAZ29389.1	94.7	6e-20	GH99
2049685926	PBDCA2_14459780	ABG76972.1	99.8	2e-21	GH9
2049686567	PBDCA2_14468090	ACJ34962.1	75.5	4e-14	GH13
2049688972	PBDCA2_14522770	ABN52453.1	155	4e-38	GH94/GT84
2049690070	PBDCA2_14542020	ACI16879.1	111	1e-24	GH23
2049696345	PBDCA2_14680730	BAA95685.1	70.5	1e-12	GH39
2049699883	PBDCA2_14755780	ABQ05071.1	174	5e-44	GH29
2049700364	PBDCA2_14765380	NP_809934.1	110	1e-24	GH43
2049702001	PBDCA2_14801880	ACM06887.1	98.2	5e-21	GH23
2049703992	PBDCA2_14841940	ABR49663.1	74.3	8e-14	GH94/GT84
2049705307	PBDCA2_14871710	ABQ07183.1	73.6	1e-13	GH18
2049709782	PBDCA2_14962520	ABN52453.1	187	1e-47	GH94/GT84
2049712234	PBDCA2_15018320	ABZ73207.1	215	3e-56	GH2
2049712939	PBDCA2_15032350	ABJ07582.1	140	6e-34	GH94/GT84
2049715477	PBDCA2_15084560	CAK42323.1	73.9	2e-13	LDA1
2049716185	PBDCA2_15102840	ABX81794.1	99.8	1e-21	GH20
2049719053	PBDCA2_15160450	CAD48309.1	146	1e-35	GH3
2049719437	PBDCA2_15171040	ABZ69452.1	202	2e-52	GH36
2049720206	PBDCA2_15184500	NP_693009.1	97.4	8e-21	GH28
2049720655	PBDCA2_15193480	EAA63677.1	101	1e-21	GH1/GH95
2049721170	PBDCA2_15207520	XP_331443.1	67.8	7e-12	GH93
2049722329	PBDCA2_15229220	ABB74705.1	104	1e-22	GH13/GH77
2049723710	PBDCA2_15259680	BAF71407.1	79.3	2e-15	GH3
2049723966	PBDCA2_15262880	NP_864910.1	196	1e-49	GH43
2049726821	PBDCA2_15329090	ABG82385.1	97.4	9e-21	GH13
2049727207	PBDCA2_15334770	ABS04943.1	114	7e-26	GH3
2049729717	PBDCA2_15386340	CAI79477.1	151	1e-36	GH10
2049731069	PBDCA2_15413520	CAZ29389.1	121	2e-27	GH99
2049734257	PBDCA2_15486290	ABD80168.1	85.1	4e-17	GH94
2049734419	PBDCA2_15487910	ACM06887.1	72.4	3e-13	GH23
2049735769	PBDCA2_15517620	EAZ80128.1	67.8	6e-12	GH109
2049739430	PBDCA2_15596040	CAH06053.1	182	2e-46	GH3
2049741205	PBDCA2_15633250	ABZ70433.1	206	2e-53	GH3
2049743905	PBDCA2_15684980	ACB76500.1	177	1e-44	GH27
2049745992	PBDCA2_15730390	AAR58827.1	112	4e-25	GH2
2049746379	PBDCA2_15741040	EAU87895.1	72.4	3e-13	LDA1
2049746702	PBDCA2_15749480	ACS60794.1	75.9	2e-14	GH63
2049746994	PBDCA2_15755060	ACR75584.1	105	4e-23	GH77
2049750466	PBDCA2_15830060	NP_561897.1	120	1e-27	GH20
2049750498	PBDCA2_15830380	ABY40380.1	104	5e-23	GH18
2049752420	PBDCA2_15870070	ABE49457.1	78.6	4e-15	GH13
2049753162	PBDCA2_15885200	ABD26384.1	238	5e-63	GH103
2049753226	PBDCA2_15886910	CAG81278.1	114	1e-25	LO3
2049756279	PBDCA2_15948990	ACK43074.1	357	3e-98	GH2
2049756732	PBDCA2_15959770	CAG81278.1	161	8e-40	LO3
2049757380	PBDCA2_15976490	CAJ68298.1	98.2	5e-21	GH18
2049759187	PBDCA2_16015880	BAF59767.1	162	3e-40	GH13
2049759871	PBDCA2_16024800	BAA04972.1	190	3e-48	GH59
2049759935	PBDCA2_16026450	ABQ70278.1	365	6e-101	GH3
2049767200	PBDCA2_16181180	ABZ73922.1	115	7e-26	GH16
2049767938	PBDCA2_16200720	ABY94276.1	87.4	1e-17	GH38
2049772655	PBDCA2_16297370	ACK66140.1	241	7e-64	GH13
2049777859	PBDCA2_16407100	BAH05959.1	80.5	1e-15	GH18
2049778564	PBDCA2_16425820	CAN00102.1	139	4e-33	GH3
2049779622	PBDCA2_16444470	ABE81277.1	84.7	6e-17	GH33
2049781654	PBDCA2_16489100	NP_948979.1	128	7e-30	GH77
2049782232	PBDCA2_16504350	CAN94460.1	134	6e-32	GH1
2049783998	PBDCA2_16541560	EDS51434.1	68.9	3e-12	GH115
2049784126	PBDCA2_16544910	BAE51688.1	130	1e-30	GH25
2049785120	PBDCA2_16562170	CAL65352.1	78.6	4e-15	GH43
2049789548	PBDCA2_16661250	ABI61650.1	91.7	5e-19	GH13
2049790836	PBDCA2_16686570	ABJ81713.1	125	5e-29	GH50
2049791964	PBDCA2_16707520	EAA63395.1	117	3e-26	GH2
2049792320	PBDCA2_16716460	NP_643620.1	117	1e-26	GH97
2049793093	PBDCA2_16736750	ABA21051.1	88.2	5e-18	GH13
2049793607	PBDCA2_16744120	ACL76467.1	70.1	1e-12	GH53
2049796238	PBDCA2_16800510	ACC58035.1	85.1	7e-17	GH23
2049802999	PBDCA2_16941550	ABR45001.1	83.6	3e-16	GH2
2049803063	PBDCA2_16943230	ACL70061.1	71.6	6e-13	GH2
2049807485	PBDCA2_17041270	ABK12325.1	68.6	4e-12	GH94/GT84
2049809579	PBDCA2_17084300	ABX02671.1	139	2e-33	GH29
2049810255	PBDCA2_17095640	ABG03051.1	164	1e-40	GH38
2049817468	PBDCA2_17248610	ACN28438.1	141	9e-34	GH28
2049821550	PBDCA2_17337500	ABW17626.1	66.2	3e-11	GH39
2049825862	PBDCA2_17427750	BAF60462.1	70.1	1e-12	GH3
2049826157	PBDCA2_17430930	EAA63395.1	73.2	2e-13	GH2
2049826384	PBDCA2_17436460	ABW26910.1	103	1e-22	GH39
2049826838	PBDCA2_17448810	ACL70794.1	128	5e-30	GH2
2049831946	PBDCA2_17555180	ABI14440.1	84.3	1e-16	LDA8
2049839980	PBDCA2_17730800	ACC72295.1	181	3e-46	GH31
2049841718	PBDCA2_17768300	ABM06849.1	112	2e-25	GH51
2049842263	PBDCA2_17773990	CAJ73819.1	691	0	GH13
2049843579	PBDCA2_17807330	ABN52453.1	130	1e-30	GH94/GT84
2049843707	PBDCA2_17808610	ABX43720.1	79.7	2e-15	GH9
2049844092	PBDCA2_17812870	NP_864910.1	86.7	7e-17	GH43
2049845352	PBDCA2_17845270	ABG53928.1	115	2e-26	GH13
2049846445	PBDCA2_17864750	NP_864910.1	71.2	6e-13	GH43
2049847698	PBDCA2_17889430	ABG84865.1	579	2e-164	GH38
2049850600	PBDCA2_17956890	AAZ55992.1	72.4	3e-13	GH48
2049852205	PBDCA2_17990310	CAD48308.1	111	4e-25	GH39
2049856263	PBDCA2_18075400	ACI58840.1	108	2e-24	GH94
2049858742	PBDCA2_18125350	ACR74776.1	77.8	6e-15	GH13
2049858903	PBDCA2_18129670	ACM61441.1	135	3e-32	GH43
2049860833	PBDCA2_18171120	ABL66729.1	101	4e-22	GH33
2049861412	PBDCA2_18186320	ACI20082.1	125	3e-29	GH3
2049861988	PBDCA2_18192950	NP_811824.1	129	1e-29	GH106/GH43
2049863594	PBDCA2_18228640	CAN93223.1	67.8	7e-12	GH13
2049865071	PBDCA2_18264090	ACC84007.1	119	2e-27	GH13
2049865135	PBDCA2_18264730	ABF42123.1	84	1e-16	GH38
2049865327	PBDCA2_18266650	CAM75838.1	108	4e-24	GH13
2049867615	PBDCA2_18314680	CAG58981.1	80.1	1e-15	LO3
2049867871	PBDCA2_18321550	ACB75560.1	251	8e-67	GH106/CE15
2049869319	PBDCA2_18350050	ACR13804.1	91.7	1e-18	GH39
2049871307	PBDCA2_18393300	ABJ86267.1	79.7	2e-15	GH77
2049871755	PBDCA2_18405700	ACK49819.1	161	5e-40	GH23
2049873428	PBDCA2_18441030	CAN90508.1	111	5e-25	GH77
2049874520	PBDCA2_18460310	ABR38060.1	624	3e-178	GH109
2049876000	PBDCA2_18494610	BAH05588.1	73.9	1e-13	GH94/GT84
2049876707	PBDCA2_18508350	ABR43370.1	124	7e-29	GH92
2049879888	PBDCA2_18573770	ACB75560.1	75.1	4e-14	GH106/CE15
2049885600	PBDCA2_18696530	CAJ85791.1	68.2	5e-12	LDA6
2049886628	PBDCA2_18720700	CAN65674.1	102	2e-22	GH28
2049890851	PBDCA2_18807550	ACL76454.1	210	2e-54	GH94
2049891684	PBDCA2_18829160	ABB74704.1	164	7e-41	GH13
2049891788	PBDCA2_18831670	ABJ86506.1	93.6	1e-19	GH78
2049892173	PBDCA2_18835680	ABE63313.1	105	4e-23	GH94/GT84
2049893135	PBDCA2_18857940	CAL13228.1	201	3e-52	GH94/GT84
2049893874	PBDCA2_18873270	ABR32637.1	67	1e-11	GH105
2049894742	PBDCA2_18891750	ABJ62006.1	175	6e-44	GH13
2049896192	PBDCA2_18920840	ACL77529.1	179	1e-45	GH43
2049007575	PBDCA2_34690	P56216.1	77.8	6e-15	LDA2
2049012023	PBDCA2_127020	CAN65674.1	162	5e-40	GH28
2049013048	PBDCA2_150180	ACJ34628.1	115	2e-26	GH13
2049013272	PBDCA2_152430	ABC98411.1	72.4	3e-13	GH13
2049016067	PBDCA2_214280	ABN13675.1	157	1e-38	GH2
2049020107	PBDCA2_300920	ABX43668.1	130	6e-31	GH65
2049024000	PBDCA2_379450	ACL71075.1	112	2e-25	GH4
2049024643	PBDCA2_393940	ABA56022.1	175	4e-44	GH12
2049027933	PBDCA2_462090	ABP34383.1	97.8	1e-20	GH8
2049028445	PBDCA2_476010	ABN52453.1	119	3e-27	GH94/GT84
2049033649	PBDCA2_584190	ACR74768.1	73.2	3e-13	GH53
2049035251	PBDCA2_617480	ABQ04594.1	149	2e-36	GH30
2049036281	PBDCA2_644760	NP_812769.1	103	1e-22	GH92
2049040823	PBDCA2_737150	ABZ73922.1	81.6	5e-16	GH16
2049046969	PBDCA2_871870	ACL15994.1	101	5e-22	GH94/GT84
2049049376	PBDCA2_917340	ACL75611.1	680	0	GH51
2049050433	PBDCA2_945150	ABR44849.1	120	6e-28	GH92
2049051597	PBDCA2_967290	BAE58888.1	82	7e-16	LDA6
2049054551	PBDCA2_1028670	BAD79608.1	83.2	2e-16	GH13
2049058694	PBDCA2_1118850	NP_823030.1	76.6	2e-14	GH5
2049061791	PBDCA2_1182350	ABO90617.1	67	3e-11	GH23
2049062277	PBDCA2_1195080	EDP26020.1	130	1e-30	GH113
2049065203	PBDCA2_1256580	ACM12417.1	67.4	9e-12	GH112
2049065717	PBDCA2_1266960	ACL76454.1	268	7e-72	GH94
2049066492	PBDCA2_1287670	ABG84084.1	79.7	2e-15	GH31
2049071033	PBDCA2_1378910	AAM25311.1	135	3e-32	GH94/GT84
2049072707	PBDCA2_1413910	CAL42861.1	107	6e-24	GH3
2049072739	PBDCA2_1414770	CAG58981.1	114	2e-25	LO3
2049073797	PBDCA2_1443040	ACO33646.1	73.9	1e-13	GH13
2049074407	PBDCA2_1450230	ABY40380.1	114	1e-24	GH18
2049075404	PBDCA2_1476250	ABZ73922.1	69.3	2e-12	GH16
2049079315	PBDCA2_1559550	CAP85801.1	82	4e-16	LO3
2049081670	PBDCA2_1604960	BAG47810.1	92	4e-19	GH13
2049086427	PBDCA2_1711870	ABR38459.1	128	3e-30	GH92
2049087912	PBDCA2_1742300	BAD07748.1	110	1e-24	GH3
2049090363	PBDCA2_1790770	AAK80693.1	86.7	2e-17	GH18
2049096180	PBDCA2_1912480	CAB53341.1	224	6e-59	GH78
2049097469	PBDCA2_1941650	NP_636630.1	65.1	5e-11	GH2
2049099695	PBDCA2_1987080	ABR38224.1	65.1	1e-10	GH105
2049103976	PBDCA2_2081760	NP_420565.1	171	4e-43	GH30
2049105809	PBDCA2_2120570	AAF79504.1	77.4	8e-15	GH36
2049106676	PBDCA2_2134490	CAG81278.1	205	2e-52	LO3
2049110866	PBDCA2_2225740	ABA58152.1	186	3e-47	GH13
2049111380	PBDCA2_2239200	ABP66719.1	150	7e-37	GH78
2049111703	PBDCA2_2244500	ABX42576.1	83.6	1e-16	GH18
2049120720	PBDCA2_2436120	AAO33827.1	135	3e-32	GH97
2049124269	PBDCA2_2511480	ACL75793.1	158	4e-39	GH94
2049124849	PBDCA2_2518800	ACS65297.1	328	8e-90	GH13
2049127499	PBDCA2_2581040	BAB20931.1	76.3	2e-14	GH10
2049127727	PBDCA2_2586560	CAN93214.1	74.7	5e-14	GH1
2049132068	PBDCA2_2673510	CAP85801.1	111	1e-24	LO3
2049136696	PBDCA2_2776900	BAH46785.1	134	8e-32	GH2
2049137082	PBDCA2_2780760	ABB74486.1	92.4	3e-19	GH94
2049141338	PBDCA2_2871460	CAP96278.1	81.3	9e-16	GH2
2049141663	PBDCA2_2880180	ABE34447.1	141	6e-34	GH94/GT84
2049152311	PBDCA2_3105920	ABJ84713.1	172	3e-43	GH78
2049156369	PBDCA2_3193990	ABJ85566.1	190	7e-49	GH2
2049159209	PBDCA2_3250770	ABJ86298.1	241	5e-64	GH95
2049161518	PBDCA2_3302140	ABJ83668.1	178	4e-45	GH3
2049164256	PBDCA2_3356310	ABX42024.1	142	7e-34	GH18
2049166288	PBDCA2_3400730	BAE60908.1	89	6e-18	LO1
2049166417	PBDCA2_3404140	ABJ85806.1	73.2	2e-13	GH28
2049169891	PBDCA2_3476650	ABN54185.1	121	5e-28	GH94
2049170859	PBDCA2_3502020	ACL59174.1	120	1e-27	GH108
2049173153	PBDCA2_3545500	NP_822463.1	88.6	5e-18	GH75
2049173861	PBDCA2_3563800	NP_624805.1	67.8	1e-11	GH78
2049174478	PBDCA2_3578500	AAR35733.2	122	2e-28	GH57
2049177179	PBDCA2_3632060	XP_331443.1	148	4e-36	GH93
2049178044	PBDCA2_3654130	CAK44017.1	71.6	5e-13	LO1
2049182160	PBDCA2_3736190	CAL14748.1	164	6e-41	GH13
2049183064	PBDCA2_3760000	ABJ84616.1	68.6	4e-12	GH51
2049183258	PBDCA2_3764940	ACF55749.1	94	1e-19	GH31
2049185195	PBDCA2_3806000	AAF79504.1	89	3e-18	GH36
2049188729	PBDCA2_3881010	ACK67126.1	98.6	4e-21	GH15
2049191750	PBDCA2_3942060	ACL77187.1	70.5	2e-12	GH18
2049196000	PBDCA2_4034070	NP_809045.1	87.8	7e-18	GH97
2049198574	PBDCA2_4085430	ACI64715.1	134	8e-32	GH38
2049200051	PBDCA2_4115570	EAA65188.1	98.6	1e-20	GH78
2049204135	PBDCA2_4204880	CAZ29389.1	81.6	5e-16	GH99
2049205101	PBDCA2_4225820	ABX42243.1	80.1	1e-15	GH65
2049205454	PBDCA2_4230550	BAE62106.1	66.2	8e-11	LO3
2049207449	PBDCA2_4273420	ABR44241.1	102	3e-22	GH20
2049207930	PBDCA2_4286580	ACL76905.1	145	3e-35	GH94/GT84
2049210245	PBDCA2_4338280	ACL95833.1	111	4e-25	GH13
2049210311	PBDCA2_4338940	ACL24977.1	101	5e-22	GH13
2049222353	PBDCA2_4595290	ACL75382.1	196	2e-50	GH95
2049222547	PBDCA2_4600430	ACD03906.1	87.4	9e-18	GH89
2049223060	PBDCA2_4609150	BAD48504.1	86.7	1e-17	GH63
2049224353	PBDCA2_4639460	NP_826933.1	133	1e-31	GH35
2049230539	PBDCA2_4765600	ACD04696.1	135	2e-31	GH105
2049237350	PBDCA2_4913350	ACJ72869.1	85.9	3e-17	LO2
2049241942	PBDCA2_5010940	ABC45027.1	71.2	1e-12	GH3
2049244067	PBDCA2_5057520	CAN65674.1	88.2	5e-18	GH28
2049245640	PBDCA2_5090050	CAQ18050.1	131	5e-31	GH13
2049247631	PBDCA2_5132700	CAL93899.1	100	8e-22	GH17/GT2
2049248144	PBDCA2_5142320	ABX42302.1	94.7	5e-20	GH13
2049250336	PBDCA2_5185540	ABW17626.1	65.9	3e-11	GH39
2049255474	PBDCA2_5295850	ABE49457.1	90.5	1e-18	GH13
2049259635	PBDCA2_5383820	ABJ83644.1	128	7e-30	GH29
2049264102	PBDCA2_5482340	CAA36787.1	70.5	1e-12	LO1
2049264618	PBDCA2_5488010	ABR43370.1	536	5e-152	GH92
2049267771	PBDCA2_5559370	CAN96902.1	123	1e-28	GH15
2049268315	PBDCA2_5567530	ABR38842.1	141	8e-34	GH2
2049268411	PBDCA2_5570010	ABD26167.1	130	2e-30	GH106
2049273497	PBDCA2_5676480	NP_562331.1	237	2e-61	GH38
2049282490	PBDCA2_5867430	ACS65295.1	79	3e-15	GH13
2049285675	PBDCA2_5938990	ABY92394.1	95.1	5e-20	GH38
2049289896	PBDCA2_6025290	ACJ72867.1	92.8	2e-19	LO2
2049293777	PBDCA2_6109760	ABY40380.1	118	8e-27	GH18
2049297482	PBDCA2_6189150	EAQ48518.1	181	5e-46	GH115
2049303652	PBDCA2_6320390	ABE63313.1	79	3e-15	GH94/GT84
2049304716	PBDCA2_6343600	ACL74590.1	280	8e-76	GH3
2049306263	PBDCA2_6375840	BAB62315.1	73.2	2e-13	GH78
2049307358	PBDCA2_6397570	BAA74508.1	78.6	4e-15	GH67
2049307939	PBDCA2_6411380	ACJ72869.1	222	3e-58	LO2
2049309615	PBDCA2_6446430	ABY94276.1	91.7	4e-19	GH38
2049313697	PBDCA2_6536170	ABX43668.1	99.8	2e-21	GH65
2049318819	PBDCA2_6644330	CAG81278.1	77.4	1e-14	LO3
2049320360	PBDCA2_6676140	ACL77529.1	175	4e-44	GH43
2049322418	PBDCA2_6721950	NP_826394.1	151	3e-37	GH6
2049322610	PBDCA2_6726930	BAF90415.1	150	9e-37	GH18
2049323739	PBDCA2_6747440	ABX31549.1	218	5e-57	GH36
2049324577	PBDCA2_6769590	ACB75101.1	127	1e-29	GH51
2049329527	PBDCA2_6872340	ACM61450.1	185	4e-47	GH105
2049330363	PBDCA2_6887550	AAC19169.1	80.9	8e-16	GH5
2049330591	PBDCA2_6891070	ABC78593.1	100	4e-21	GH13
2049332487	PBDCA2_6931510	NP_813063.1	68.2	1e-11	GH42/GH43
2049335439	PBDCA2_6998290	ACK73075.1	84.3	7e-17	GH13
2049336047	PBDCA2_7007400	ABX42305.1	200	2e-51	GH1
2049336143	PBDCA2_7009880	ABR40549.1	64.3	9e-11	GH2
2049337496	PBDCA2_7039480	ABP66717.1	92.4	3e-19	GH78
2049337624	PBDCA2_7040780	AAZ63580.1	99.8	2e-21	GH13
2049339235	PBDCA2_7076670	ABO49988.1	99	3e-21	GH13
2049339267	PBDCA2_7076990	ACL76905.1	94	1e-19	GH94/GT84
2049339491	PBDCA2_7080480	ABM13593.1	346	4e-95	GH13
2049348342	PBDCA2_7269530	ACR74768.1	73.9	3e-13	GH53
2049349819	PBDCA2_7303290	BAD50730.1	87	1e-17	GH97
2049351202	PBDCA2_7336420	NP_923026.1	73.9	9e-14	GH38
2049351591	PBDCA2_7341400	NP_612844.1	75.5	3e-14	GH24
2049354161	PBDCA2_7396920	CAN65674.1	144	1e-34	GH28
2049354904	PBDCA2_7414780	ABN77268.1	73.2	2e-13	GH16
2049355519	PBDCA2_7423260	ABC78297.1	78.2	5e-15	GH102
2049365046	PBDCA2_7628660	ABX41049.1	167	9e-42	GH3
2049366203	PBDCA2_7650190	CAN93214.1	92	7e-19	GH1
2049367170	PBDCA2_7675430	CAG90400.1	82	4e-16	GH18
2049369583	PBDCA2_7721050	CAN65674.1	67.8	6e-12	GH28
2049371454	PBDCA2_7761270	ACB74556.1	65.1	4e-11	GH55
2049373773	PBDCA2_7813570	NP_241102.1	122	5e-28	GH81
2049374831	PBDCA2_7832430	CAG58981.1	535	2e-151	LO3
2049375216	PBDCA2_7842280	ACR74768.1	77.8	1e-14	GH53
2049378042	PBDCA2_7904770	ACB77359.1	120	1e-27	GH2
2049380554	PBDCA2_7956780	ABM18202.1	115	2e-26	GH73
2049387625	PBDCA2_8107240	NP_105130.1	180	2e-45	GH15
2049389946	PBDCA2_8159680	BAF87710.1	205	3e-53	GH17/GT2
2049390010	PBDCA2_8161460	ABW28526.1	97.4	8e-21	GH10
2049395521	PBDCA2_8280240	ACI57054.1	87.8	6e-18	GH2
2049397488	PBDCA2_8321120	CAN65674.1	110	7e-25	GH28
2049403003	PBDCA2_8436290	ABE64798.1	77.8	6e-15	GH15
2049403940	PBDCA2_8455770	ACF02660.1	254	5e-68	GH13
2049408190	PBDCA2_8548490	ACJ35120.1	137	9e-33	GH13
2049408450	PBDCA2_8551090	AAF43783.1	117	1e-26	GH3
2049409125	PBDCA2_8563580	AAD09354.1	73.2	3e-13	GH5
2049409642	PBDCA2_8577560	ABQ05025.1	80.1	2e-15	GH67
2049411252	PBDCA2_8611110	CAK03844.1	87.8	9e-18	GH2
2049415266	PBDCA2_8698280	CAJ73815.1	106	2e-23	GH77
2049417681	PBDCA2_8744410	ABK01904.1	135	7e-32	GH3
2049418131	PBDCA2_8755790	BAE60251.1	74.7	1e-13	GH3
2049420956	PBDCA2_8815810	BAF40392.1	85.1	4e-17	GH3
2049422082	PBDCA2_8843650	ABA05066.1	125	4e-29	GH3
2049422498	PBDCA2_8851590	ABW11464.1	122	2e-28	GH13
2049423494	PBDCA2_8871600	ABA74275.1	150	8e-37	GH13
2049430347	PBDCA2_9016060	BAE80444.1	68.9	6e-12	GH26
2049435584	PBDCA2_9127140	CAG81278.1	74.7	1e-13	LO3
2049437420	PBDCA2_9166640	CAN65674.1	129	2e-30	GH28
2049438799	PBDCA2_9195710	BAD50678.1	67.8	7e-12	GH33
2049439763	PBDCA2_9219630	ABN52453.1	180	9e-46	GH94/GT84
2049442141	PBDCA2_9269120	AAW76375.1	81.6	5e-16	GH43
2049443234	PBDCA2_9293550	BAG23154.1	66.6	2e-11	GH109
2049443298	PBDCA2_9295270	ACB61191.1	71.6	5e-13	GH13
2049443330	PBDCA2_9296080	ACL75030.1	74.7	5e-14	GH5
2049444332	PBDCA2_9313130	ACC79005.1	220	1e-57	GH43
2049449494	PBDCA2_9423710	ACR12748.1	72.4	3e-13	GH15
2049449655	PBDCA2_9426200	ABC31486.1	205	1e-52	GH16
2049450558	PBDCA2_9450400	ACI18714.1	145	2e-35	GH4
2049458147	PBDCA2_9611770	CAJ68298.1	74.3	7e-14	GH18
2049458339	PBDCA2_9613700	NP_953408.1	97.8	6e-21	GH13
2049462171	PBDCA2_9694830	CAJ35242.1	219	3e-57	GH3
2049465198	PBDCA2_9762560	ACN99512.1	72	4e-13	GH15
2049465518	PBDCA2_9765850	AAD52097.1	83.2	2e-15	GH18
2049465710	PBDCA2_9770300	ABG42232.1	104	6e-23	GH3
2049469472	PBDCA2_9851460	ABR44187.1	64.3	7e-11	GH28
2049470600	PBDCA2_9876410	AAQ16265.1	74.7	6e-14	GH23
2049470698	PBDCA2_9877390	CAN65674.1	67.8	8e-12	GH28
2049471787	PBDCA2_9903620	ABF46302.1	89.7	2e-18	GH1
2049476585	PBDCA2_10003380	NP_561747.1	159	2e-39	GH2
2049482927	PBDCA2_10140560	ABV43684.1	77.4	9e-15	GH4
2049484865	PBDCA2_10179880	CAB14832.2	105	3e-23	GH51
2049485187	PBDCA2_10185230	ABQ04980.1	67.4	9e-12	GH13
2049485219	PBDCA2_10186070	ACD24635.1	91.3	1e-18	GH73
2049485830	PBDCA2_10202760	CAI43283.4	102	5e-22	LDA6
2049488153	PBDCA2_10253170	ACI16879.1	66.6	2e-11	GH23
2049489086	PBDCA2_10269980	CAX83969.1	219	2e-57	GH1
2049489982	PBDCA2_10291920	ACL02590.1	105	4e-23	GH13
2049491402	PBDCA2_10321420	ACL95685.1	233	9e-62	GH1
2049492622	PBDCA2_10344770	BAE79119.1	116	3e-26	GH73
2049499121	PBDCA2_10483980	NP_624665.1	64.7	6e-11	GH95
2049499478	PBDCA2_10489820	ACB74661.1	81.3	2e-15	GH105
2049500539	PBDCA2_10518040	CAS03970.1	105	4e-23	GH31
2049502380	PBDCA2_10556610	ABZ72404.1	162	3e-40	GH31
2049510534	PBDCA2_10726660	ACL24977.1	292	3e-79	GH13
2049517659	PBDCA2_10877500	ABJ83655.1	266	2e-71	GH67
2049521620	PBDCA2_10963750	ABU57965.1	114	8e-26	GH78
2049528024	PBDCA2_11095530	NP_485101.1	99.8	5e-21	GH65
2049529218	PBDCA2_11126350	ACL77529.1	81.3	6e-16	GH43
2049530792	PBDCA2_11159000	ABQ46970.1	118	4e-27	GH1
2049533396	PBDCA2_11209470	ACR74768.1	80.1	1e-14	GH53
2049534779	PBDCA2_11243130	ABJ83644.1	115	3e-26	GH29
2049538090	PBDCA2_11314620	AAY38069.1	86.7	1e-17	GH3
2049541986	PBDCA2_11394500	CAN65674.1	78.6	4e-15	GH28
2049542277	PBDCA2_11397940	XP_322959.1	70.1	4e-11	GH63
2049543461	PBDCA2_11429040	ABY95850.1	78.2	5e-15	GH23
2049544588	PBDCA2_11449830	EAQ17732.1	73.2	2e-13	GH113
2049546778	PBDCA2_11498840	ACR80266.1	96.7	2e-20	GH13
2049549382	PBDCA2_11549030	NP_463714.1	271	3e-72	GH31
2049550986	PBDCA2_11584770	ABD69886.1	107	7e-24	GH13
2049554011	PBDCA2_11652300	ABX06099.1	139	3e-33	GH3
2049562322	PBDCA2_11824090	CAP83076.1	65.5	4e-11	GH13
2049565473	PBDCA2_11889180	ABA56022.1	94	1e-18	GH12
2049570103	PBDCA2_11992750	ABV32788.1	108	3e-24	GH42
2049571032	PBDCA2_12007800	NP_142480.1	78.6	4e-15	GH35
2049571609	PBDCA2_12023910	NP_822202.1	70.5	1e-12	GH42
2049571641	PBDCA2_12024820	NP_812984.1	222	3e-58	GH92
2049572413	PBDCA2_12038930	ACJ72869.1	82.8	2e-16	LO2
2049575085	PBDCA2_12097900	NP_864910.1	97.4	1e-20	GH43
2049576668	PBDCA2_12130640	CAJ85791.1	79.3	3e-15	LDA6
2049577372	PBDCA2_12148860	BAA32403.1	99	3e-21	GH3
2049579367	PBDCA2_12189240	ABU57036.1	84	1e-16	GH78
2049581292	PBDCA2_12228580	ABP45478.1	87.4	1e-17	GH18/GH5
2049581580	PBDCA2_12232780	ABJ83668.1	407	2e-113	GH3
2049582736	PBDCA2_12263360	BAD39289.1	103	1e-22	GH20
2049586497	PBDCA2_12340930	ABJ81884.1	105	4e-23	GH94/GT84
2049587460	PBDCA2_12360630	XP_331443.1	110	2e-24	GH93
2049592507	PBDCA2_12466860	ABP68258.1	192	4e-49	GH67
2049593404	PBDCA2_12490190	NP_809932.1	83.6	1e-16	GH78
2049596664	PBDCA2_12559110	ACB75334.1	103	1e-22	GH2
2049602076	PBDCA2_12674260	ABQ05111.1	146	2e-35	GH50
2049602657	PBDCA2_12682140	ACL66712.1	68.2	6e-12	GH94/GT84
2049602913	PBDCA2_12687400	ABR37891.1	73.2	4e-13	GH106
2049610694	PBDCA2_12857170	AAD09354.1	70.9	9e-13	GH5
2049613458	PBDCA2_12912180	AAD52097.1	73.6	4e-13	GH18
2049614424	PBDCA2_12937260	ACI19441.1	107	9e-24	GH3
2049615909	PBDCA2_12967010	EAA63677.1	68.9	3e-12	GH1/GH95
2049616005	PBDCA2_12969700	CAP61633.1	84.7	8e-17	LDA1
2049616197	PBDCA2_12974850	ACM19575.1	209	2e-54	GH13
2049616679	PBDCA2_12984270	ACA41547.1	95.9	2e-20	GH18
2049624686	PBDCA2_13153310	AAW20552.1	64.7	8e-11	GH16
2049627642	PBDCA2_13214060	ABG03292.1	82.8	2e-16	GH13
2049631241	PBDCA2_13290520	ACR76545.1	109	1e-23	GH94
2049632620	PBDCA2_13323880	ABK97667.1	134	5e-32	GH57
2049634261	PBDCA2_13360850	ACR11184.1	69.7	2e-12	GH95
2049636291	PBDCA2_13400990	AAR89504.1	77.8	7e-15	GH25
2049636555	PBDCA2_13403850	AAD52097.1	87.4	5e-17	GH18
2049637391	PBDCA2_13425780	ABJ88503.1	98.6	3e-21	GH42
2049646518	PBDCA2_13621480	CAJ54387.1	104	5e-23	GH57
2049648389	PBDCA2_13661010	ABJ81932.1	129	3e-30	GH36
2049652824	PBDCA2_13751300	ABA59430.1	148	8e-36	GH23
2049654077	PBDCA2_13778570	NP_623660.1	67	1e-11	GH23
2049654401	PBDCA2_13783810	XP_331443.1	170	2e-42	GH93
2049658394	PBDCA2_13870820	ABF53445.1	134	7e-32	GH23
2049659461	PBDCA2_13893050	ACO33506.1	82	4e-16	GH3
2049666096	PBDCA2_14038160	CAH00655.1	94	1e-19	LO3
2049667219	PBDCA2_14058420	ACM58429.1	120	1e-27	GH36
2049667476	PBDCA2_14065340	ABG04940.1	110	2e-24	GH3
2049667958	PBDCA2_14078140	ACL77187.1	70.1	1e-12	GH18
2049668542	PBDCA2_14085530	ABD79822.1	67.4	9e-12	GH9
2049668869	PBDCA2_14092770	ACR74768.1	77.8	1e-14	GH53
2049673114	PBDCA2_14186710	ABO49336.1	66.2	2e-11	GH23
2049677561	PBDCA2_14276410	ABA56022.1	72.4	1e-12	GH12
2049677754	PBDCA2_14281410	ABJ81932.1	169	3e-42	GH36
2049680462	PBDCA2_14343760	ABM06312.1	148	5e-36	GH1
2049680881	PBDCA2_14347950	ABQ04433.1	100	1e-21	GH65
2049681458	PBDCA2_14360860	AAT66046.1	101	8e-22	GH9
2049682324	PBDCA2_14383130	BAA97041.1	102	3e-22	GH15
2049684156	PBDCA2_14421590	CAG58981.1	64.3	7e-11	LO3
2049695026	PBDCA2_14651140	ABQ71469.1	81.6	4e-16	GH23
2049696602	PBDCA2_14687300	CAK49119.1	84.3	8e-17	GH78
2049697472	PBDCA2_14701010	ABR41450.1	81.3	6e-16	GH2
2049706405	PBDCA2_14891400	ACL77529.1	100	1e-21	GH43
2049706950	PBDCA2_14906370	BAE60251.1	73.2	2e-13	GH3
2049706983	PBDCA2_14907190	CAN65674.1	123	1e-28	GH28
2049711619	PBDCA2_15001550	NP_471870.1	147	1e-35	GH31
2049713390	PBDCA2_15039300	NP_173761.2	69.7	2e-12	GH28
2049718827	PBDCA2_15154410	ACE84353.1	182	2e-46	GH43
2049719534	PBDCA2_15173550	CAK44017.1	80.9	7e-16	LO1
2049724352	PBDCA2_15272940	ACS22117.1	202	3e-52	GH3
2049725926	PBDCA2_15305220	ACL76655.1	86.3	2e-17	GH10
2049726886	PBDCA2_15330820	AAK77953.1	73.6	1e-13	LO1
2049727014	PBDCA2_15332840	ACL69176.1	110	1e-24	GH3
2049727307	PBDCA2_15335770	ACH37165.1	86.7	1e-17	GH13
2049742683	PBDCA2_15662820	ACL70804.1	103	2e-22	GH2
2049744610	PBDCA2_15703660	ABR42029.1	71.2	6e-13	GH38
2049745125	PBDCA2_15715760	ABC63480.1	120	1e-27	GH23
2049748053	PBDCA2_15776190	ACI16879.1	81.3	1e-15	GH23
2049748823	PBDCA2_15793430	CAN98220.1	132	2e-31	GH15
2049749953	PBDCA2_15818140	CAG81278.1	85.9	4e-17	LO3
2049750884	PBDCA2_15834630	ACI49189.1	74.7	6e-14	GH13
2049755928	PBDCA2_15945350	ABR44729.1	70.1	1e-12	GH2
2049761091	PBDCA2_16056430	ACL77529.1	86.3	2e-17	GH43
2049764118	PBDCA2_16118360	CAN65674.1	72	3e-13	GH28
2049766271	PBDCA2_16166130	ACL77187.1	76.3	2e-14	GH18
2049770797	PBDCA2_16257720	AAT42241.1	65.9	3e-11	GH26
2049775032	PBDCA2_16351520	ACB74556.1	136	1e-32	GH55
2049775672	PBDCA2_16363030	CAA43035.1	97.4	8e-21	GH9
2049776735	PBDCA2_16386820	ABF39905.1	125	2e-29	GH29
2049777764	PBDCA2_16404860	XP_331443.1	70.9	5e-12	GH93
2049779141	PBDCA2_16438310	AAM25311.1	103	1e-22	GH94/GT84
2049780396	PBDCA2_16465160	NP_945731.1	108	4e-24	GH4
2049780977	PBDCA2_16476390	ABK52390.1	73.9	1e-13	GH48
2049781331	PBDCA2_16480830	ABA58247.1	285	1e-76	GH65
2049787949	PBDCA2_16626460	ACG80113.1	152	1e-37	GH94/GT84
2049788909	PBDCA2_16643800	ACR74768.1	77.4	1e-14	GH53
2049789805	PBDCA2_16665500	ABD80655.1	84.7	5e-17	GH16
2049790837	PBDCA2_16686620	ABJ05991.1	165	3e-41	GH103
2049797074	PBDCA2_16818870	ACB76891.1	87	1e-17	GH2
2049797842	PBDCA2_16832990	BAE55581.1	77.8	1e-14	LDA6
2049807743	PBDCA2_17046390	ACE91512.1	147	9e-36	GH2
2049811833	PBDCA2_17128120	EAU87895.1	92	1e-18	LDA1
2049812187	PBDCA2_17137260	NP_485101.1	81.3	1e-15	GH65
2049813028	PBDCA2_17159220	CAN65674.1	84	9e-17	GH28
2049814381	PBDCA2_17186230	AAF31169.1	69.3	2e-12	LDA1
2049814477	PBDCA2_17188710	BAC16218.1	73.6	1e-13	GH32
2049816243	PBDCA2_17225830	ACM06887.1	72.4	3e-13	GH23
2049817661	PBDCA2_17253870	ABL99401.1	65.9	3e-11	GH109
2049818530	PBDCA2_17274050	AAW87176.1	109	2e-24	GH2
2049818786	PBDCA2_17276620	ABP93305.1	85.1	4e-17	GH3
2049819239	PBDCA2_17285820	CAA47161.1	88.2	1e-17	GH2
2049820520	PBDCA2_17313930	ACI18200.1	94.4	8e-20	GH3
2049821198	PBDCA2_17327870	CAG90288.1	206	1e-53	GH5
2049821230	PBDCA2_17328680	ACB74651.1	186	2e-47	GH43
2049822971	PBDCA2_17365380	ACI19983.1	110	2e-24	GH78
2049824805	PBDCA2_17403640	ABD81757.1	119	1e-27	GH3
2049834739	PBDCA2_17617560	ABN53021.1	90.9	9e-19	GH18
2049840981	PBDCA2_17749050	ACD24850.1	67.4	8e-12	GH39
2049841333	PBDCA2_17758750	CAZ29389.1	109	2e-24	GH99
2049843195	PBDCA2_17798400	ACD52713.1	72.4	3e-13	GH73
2049844801	PBDCA2_17831060	EAA63396.1	71.2	1e-12	GH76
2049848019	PBDCA2_17897320	BAH44763.1	73.2	3e-13	GH57/GT4
2049848953	PBDCA2_17921740	ACB08479.1	81.3	6e-16	GH3
2049849535	PBDCA2_17928560	BAH46778.1	98.2	2e-20	GH63
2049856200	PBDCA2_18074770	ABN53399.1	81.3	7e-16	GH2
2049856232	PBDCA2_18075090	ABP66717.1	102	2e-22	GH78
2049857522	PBDCA2_18103060	ACB77556.1	116	1e-26	GH95
2049857682	PBDCA2_18107200	ACQ71106.1	123	1e-28	GH1
2049858519	PBDCA2_18119680	ABC63480.1	247	1e-65	GH23
2049858936	PBDCA2_18130550	ACJ28445.1	94	1e-19	GH109
2049860610	PBDCA2_18165230	ABJ81363.1	112	2e-25	GH2
2049865907	PBDCA2_18278970	ABJ86298.1	134	9e-32	GH95
2049866167	PBDCA2_18286150	ABS27327.1	70.9	1e-12	GH16
2049869095	PBDCA2_18344730	ACN28438.1	125	5e-29	GH28
2049869512	PBDCA2_18355550	ABR34976.1	171	1e-42	GH16
2049869576	PBDCA2_18357220	ABQ07962.1	176	2e-44	GH3
2049869640	PBDCA2_18358870	CAP67298.1	71.6	9e-13	LDA6
2049873365	PBDCA2_18439370	ABX42304.1	167	4e-42	GH36
2049876097	PBDCA2_18495580	ABR62938.1	93.6	1e-19	GH2
2049879343	PBDCA2_18567770	NP_812983.1	114	9e-26	GH38
2049879889	PBDCA2_18573790	ABC29754.1	86.3	1e-16	GH16
2049882661	PBDCA2_18637030	NP_812985.1	109	1e-24	GH2
2049882725	PBDCA2_18638860	ABJ85566.1	68.6	4e-12	GH2
2049888239	PBDCA2_18757110	ACK49379.1	79.7	2e-15	GH15
2049889148	PBDCA2_18771990	ACO34294.1	132	6e-31	GH2
2049889790	PBDCA2_18789070	ABG84084.1	69.3	2e-12	GH31
2049890591	PBDCA2_18801010	ABD40448.1	159	3e-38	GH39
2049890626	PBDCA2_18801650	BAC20640.1	103	2e-22	GH65
2049006385	PBDCA2_05980	CAZ29389.1	78.2	5e-15	GH99
2049007059	PBDCA2_24080	ACO33928.1	179	2e-45	GH31
2049007224	PBDCA2_28170	ACR71981.1	70.5	9e-13	GH43
2049008024	PBDCA2_40050	BAE55581.1	109	6e-24	LDA6
2049011253	PBDCA2_112030	NP_496984.1	68.2	5e-12	GH13
2049012440	PBDCA2_138210	AAA81528.1	107	1e-23	GH18
2049018439	PBDCA2_264110	AAZ81839.1	68.2	6e-12	GH1
2049025997	PBDCA2_420390	BAB62315.1	89.7	2e-17	GH78
2049026542	PBDCA2_434540	NP_865272.1	201	5e-52	GH33
2049032109	PBDCA2_553910	ABN52453.1	167	8e-42	GH94/GT84
2049032753	PBDCA2_568770	ABZ71531.1	141	4e-34	GH3
2049039854	PBDCA2_720570	CAN65674.1	130	7e-31	GH28
2049040888	PBDCA2_739020	NP_420564.1	293	2e-79	GH3
2049041728	PBDCA2_759770	ABQ06126.1	90.5	9e-19	GH43
2049044910	PBDCA2_826410	ABY94171.1	91.3	5e-19	GH94/GT84
2049046938	PBDCA2_871080	ABJ88246.1	185	2e-47	GH13
2049053458	PBDCA2_1007050	ABQ28766.1	92.8	2e-19	GH94/GT84
2049057059	PBDCA2_1084750	BAH39526.1	178	5e-45	GH109
2049060565	PBDCA2_1158860	BAF63433.1	72.4	4e-13	LDA8
2049061021	PBDCA2_1170890	CAH06598.1	66.2	2e-11	GH95
2049070197	PBDCA2_1366440	EAA63395.1	69.3	3e-12	GH2
2049072125	PBDCA2_1406750	ABN54093.1	133	1e-31	GH18
2049073734	PBDCA2_1441560	ACL76655.1	82.4	2e-16	GH10
2049075181	PBDCA2_1470540	ABK18031.1	143	1e-34	GH57
2049076574	PBDCA2_1497320	CAJ85791.1	105	6e-23	LDA6
2049088852	PBDCA2_1757700	ABC23095.1	313	2e-85	GH13
2049095860	PBDCA2_1905720	BAH07572.1	74.7	6e-14	GH25
2049096117	PBDCA2_1910810	ACR74768.1	72	4e-13	GH53
2049096953	PBDCA2_1933530	ABN52453.1	126	2e-29	GH94/GT84
2049097051	PBDCA2_1935860	ABQ05056.1	103	1e-22	GH43
2049097244	PBDCA2_1939400	ABJ86506.1	90.9	7e-19	GH78
2049098921	PBDCA2_1975830	ACM94274.1	114	5e-26	GH3
2049099177	PBDCA2_1978990	ABY94276.1	102	2e-22	GH38
2049099595	PBDCA2_1984510	EAA61743.1	89.7	6e-18	GH31
2049105329	PBDCA2_2108030	XP_331443.1	65.9	4e-11	GH93
2049110451	PBDCA2_2214910	ABC43761.1	73.9	1e-13	GH15
2049111510	PBDCA2_2242470	ACJ72869.1	131	5e-31	LO2
2049112541	PBDCA2_2259930	ABQ67466.1	121	8e-28	GH106
2049116569	PBDCA2_2347250	ACQ81123.1	67	1e-11	GH2
2049119402	PBDCA2_2402610	CAN60684.1	72	6e-12	GH18
2049120075	PBDCA2_2419910	ABW27814.1	120	2e-27	GH2
2049120977	PBDCA2_2438690	ACM06887.1	71.6	5e-13	GH23
2049124076	PBDCA2_2507270	CAJ68298.1	114	8e-26	GH18
2049124334	PBDCA2_2512130	ABU57034.1	85.5	3e-17	GH3
2049124366	PBDCA2_2512450	CAJ68298.1	103	8e-23	GH18
2049125337	PBDCA2_2531650	NP_904370.1	89.7	2e-18	GH3
2049129241	PBDCA2_2617560	ABW19090.1	152	2e-37	GH18
2049130202	PBDCA2_2633690	ACL75354.1	154	1e-37	GH2
2049130266	PBDCA2_2635330	CAL42861.1	115	4e-26	GH3
2049132165	PBDCA2_2676140	ABN52453.1	204	7e-53	GH94/GT84
2049132295	PBDCA2_2679570	ABA56022.1	65.5	4e-11	GH12
2049134059	PBDCA2_2717440	ACP87289.1	94	9e-20	GH10
2049134219	PBDCA2_2721640	CAX83968.1	284	8e-77	GH1
2049134704	PBDCA2_2734310	CAN65674.1	166	2e-41	GH28
2049137211	PBDCA2_2782540	NP_485101.1	73.6	5e-13	GH65
2049138013	PBDCA2_2803670	ACB75293.1	185	3e-47	GH13
2049142499	PBDCA2_2895280	ACF50724.1	94	8e-20	GH97
2049143823	PBDCA2_2927380	ABM03853.1	126	1e-29	GH3
2049146047	PBDCA2_2971150	ABD88150.1	120	1e-27	GH17/GT2
2049153151	PBDCA2_3123940	CAY48992.1	145	2e-35	GH13
2049154893	PBDCA2_3161170	NP_822650.1	67.8	6e-12	GH27
2049157054	PBDCA2_3203310	EAA62552.1	70.5	1e-12	GH92
2049158405	PBDCA2_3236480	ACK51182.1	110	1e-24	GH3
2049158823	PBDCA2_3240960	AAD52097.1	71.2	1e-11	GH18
2049162097	PBDCA2_3313310	ABZ99450.1	103	1e-22	GH13
2049166898	PBDCA2_3417130	NP_643620.1	162	2e-40	GH97
2049167544	PBDCA2_3428340	ACL74590.1	136	1e-32	GH3
2049168154	PBDCA2_3440460	ACR14261.1	67	2e-11	GH11/CE15
2049168538	PBDCA2_3450570	BAF60462.1	165	2e-41	GH3
2049169476	PBDCA2_3468010	ACL95876.1	67.4	8e-12	GH23
2049176116	PBDCA2_3613600	ABX44201.1	120	1e-27	GH94
2049178013	PBDCA2_3653820	ABY92024.1	105	3e-23	GH23
2049178109	PBDCA2_3654780	NP_972059.1	95.9	2e-20	GH36
2049180358	PBDCA2_3697950	CAG58981.1	195	2e-49	LO3
2049180743	PBDCA2_3708230	AAU82837.1	80.1	2e-15	GH2
2049181777	PBDCA2_3731770	AAY87039.1	102	3e-22	GH15
2049183519	PBDCA2_3769030	AAU25648.1	72.8	2e-13	GH1
2049183551	PBDCA2_3769350	ACL95550.1	131	6e-31	GH3
2049184554	PBDCA2_3789850	ABS68622.1	231	5e-61	GH103
2049185292	PBDCA2_3806970	NP_644526.1	142	2e-34	GH67
2049190304	PBDCA2_3913120	ACI19973.1	135	2e-32	GH1
2049193392	PBDCA2_3975910	NP_625245.1	97.1	2e-20	GH38
2049194747	PBDCA2_4002840	ABR89681.1	265	1e-70	GH94/GT84
2049196161	PBDCA2_4035680	ACM51826.1	100	7e-22	GH1
2049196257	PBDCA2_4036640	ACM31353.1	95.9	2e-20	GH5
2049197031	PBDCA2_4053740	ABP44821.1	64.7	6e-11	GH13
2049199987	PBDCA2_4114400	AAD52097.1	79	3e-14	GH18
2049200245	PBDCA2_4120550	CAK22057.1	97.1	2e-20	GH73
2049201817	PBDCA2_4153260	ABB30169.1	73.2	2e-12	LO1
2049205647	PBDCA2_4235690	BAD49809.1	189	3e-48	GH51
2049207126	PBDCA2_4266060	EAA63677.1	104	1e-22	GH1/GH95
2049211244	PBDCA2_4355910	ACI93696.1	110	2e-24	GH24
2049215624	PBDCA2_4453410	ACI17347.1	64.3	7e-11	GH13
2049216269	PBDCA2_4461210	BAF60462.1	162	4e-40	GH3
2049216722	PBDCA2_4473210	ACF51065.1	176	2e-44	GH23
2049221776	PBDCA2_4579750	CAZ29389.1	107	2e-23	GH99
2049222418	PBDCA2_4597050	AAL83749.1	87	1e-17	GH5
2049223029	PBDCA2_4608840	ABS61930.1	100	9e-22	GH15
2049224547	PBDCA2_4644260	ABN52659.1	129	3e-30	GH1
2049225737	PBDCA2_4666950	ABY92474.1	131	4e-31	GH13
2049229065	PBDCA2_4735530	ABA56022.1	69.3	5e-12	GH12
2049229642	PBDCA2_4751120	ACD24850.1	64.3	8e-11	GH39
2049230412	PBDCA2_4763510	ABY94276.1	80.9	7e-16	GH38
2049231727	PBDCA2_4796360	ABN52453.1	122	2e-28	GH94/GT84
2049232439	PBDCA2_4805970	ACO33323.1	200	2e-51	GH3
2049232731	PBDCA2_4813640	ABR38697.1	228	6e-60	GH97
2049234115	PBDCA2_4841320	ACR74768.1	75.9	7e-13	GH53
2049236901	PBDCA2_4905070	NP_561897.1	146	2e-35	GH20
2049238316	PBDCA2_4933350	ABJ11330.1	242	3e-64	GH13
2049240051	PBDCA2_4970750	ABL94399.1	324	5e-89	GH13
2049240083	PBDCA2_4971590	AAR96047.1	72.8	2e-13	GH78
2049240436	PBDCA2_4981170	NP_809923.1	84.3	8e-17	GH95
2049240532	PBDCA2_4983540	CAG58981.1	78.2	5e-15	LO3
2049241527	PBDCA2_4999600	ABR35882.1	277	1e-74	GH3
2049243619	PBDCA2_5045610	ACL22490.1	73.6	1e-13	GH18
2049244164	PBDCA2_5059890	ACO31704.1	106	2e-23	GH18
2049247761	PBDCA2_5136180	CAG58981.1	84	8e-17	LO3
2049248567	PBDCA2_5148370	BAE55581.1	111	1e-24	LDA6
2049248631	PBDCA2_5149990	ABX42251.1	119	5e-27	GH87
2049253386	PBDCA2_5254850	ACO32543.1	95.1	4e-20	GH18/GT2/CE4
2049259700	PBDCA2_5385550	ABR49094.1	159	4e-39	GH13
2049261854	PBDCA2_5433520	ABX05041.1	134	8e-32	GH1
2049263527	PBDCA2_5468540	NP_469498.1	66.2	2e-11	GH18
2049265361	PBDCA2_5507820	CAZ29389.1	91.7	6e-19	GH99
2049266387	PBDCA2_5525860	NP_810682.1	155	3e-38	GH92
2049269408	PBDCA2_5595490	ABF53445.1	156	1e-38	GH23
2049270215	PBDCA2_5607830	ABE86417.1	77	1e-14	GH33
2049275923	PBDCA2_5729720	ABJ83649.1	117	8e-27	GH3
2049276631	PBDCA2_5747960	CAG58981.1	89	3e-18	LO3
2049279462	PBDCA2_5805280	BAH62956.1	110	2e-24	GH4
2049280010	PBDCA2_5819840	CAN65674.1	87.8	7e-18	GH28
2049280558	PBDCA2_5827500	NP_521799.1	92.8	2e-19	GH13
2049281652	PBDCA2_5854040	BAG21593.1	77.8	7e-15	GH16
2049282200	PBDCA2_5864300	ABO67440.1	116	1e-26	GH36
2049282720	PBDCA2_5873000	ACL77529.1	232	4e-61	GH43
2049283104	PBDCA2_5883480	CAD60736.1	113	2e-25	LO3
2049284131	PBDCA2_5903740	BAD49809.1	73.6	1e-13	GH51
2049284387	PBDCA2_5907930	ABP68313.1	146	4e-35	GH4
2049287994	PBDCA2_5984560	ACM05896.1	265	6e-71	GH13
2049289312	PBDCA2_6015220	ABV46494.1	105	4e-23	GH52
2049291854	PBDCA2_6068400	ABV33711.1	92.8	4e-19	GH10
2049296547	PBDCA2_6168910	CAA06924.1	70.5	1e-12	GH5
2049298319	PBDCA2_6206870	CAD48309.1	66.2	2e-11	GH3
2049299375	PBDCA2_6230460	ACM61015.1	193	1e-49	GH42
2049299828	PBDCA2_6242350	ACJ72869.1	137	5e-33	LO2
2049305263	PBDCA2_6356860	ABG57689.1	82	3e-16	GH15
2049305359	PBDCA2_6357820	ACJ72869.1	102	2e-22	LO2
2049306200	PBDCA2_6374200	EAA63395.1	145	4e-35	GH2
2049308910	PBDCA2_6433590	ACD21119.1	126	2e-29	GH77
2049309230	PBDCA2_6436890	NP_390018.1	70.9	2e-12	GH23
2049313250	PBDCA2_6524350	ABK38788.1	131	7e-31	GH23
2049315983	PBDCA2_6584750	CAG58981.1	75.1	4e-14	LO3
2049317627	PBDCA2_6620890	ACL75469.1	75.1	4e-14	GH18
2049319782	PBDCA2_6662010	ABR26230.1	66.2	2e-11	GH31
2049324578	PBDCA2_6769600	ABZ73097.1	92	4e-19	GH3
2049326762	PBDCA2_6812010	ABI70672.1	74.7	5e-14	GH13
2049331716	PBDCA2_6920500	CAG81278.1	81.6	5e-16	LO3
2049333867	PBDCA2_6962360	ACQ82286.1	71.6	5e-13	GH5
2049334700	PBDCA2_6981050	ABJ83655.1	165	4e-41	GH67
2049343154	PBDCA2_7159930	EDS51434.1	91.7	9e-19	GH115
2049344895	PBDCA2_7197070	CAN65674.1	125	2e-29	GH28
2049346341	PBDCA2_7228700	NP_213497.1	82.4	3e-16	GH77
2049353392	PBDCA2_7379640	AAZ63586.1	86.7	1e-17	GH13
2049356195	PBDCA2_7441210	ABZ70907.1	101	4e-22	GH15
2049358451	PBDCA2_7489870	EAA63395.1	80.5	1e-15	GH2
2049360160	PBDCA2_7526920	ABG86710.1	127	5e-30	GH112
2049362636	PBDCA2_7574190	CAJ73817.1	167	9e-42	GH57
2049363729	PBDCA2_7602370	BAB56562.1	72.8	2e-13	GH23
2049366076	PBDCA2_7646820	BAA95685.1	66.2	6e-11	GH39
2049372064	PBDCA2_7777400	AAF79504.1	80.1	2e-15	GH36
2049374896	PBDCA2_7833690	ACO33684.1	376	4e-104	GH13
2049376946	PBDCA2_7879200	CAA61884.2	77	2e-14	GH16
2049377657	PBDCA2_7898500	NP_972059.1	144	6e-35	GH36
2049378366	PBDCA2_7908610	CAN61133.1	84.7	5e-17	GH36
2049384473	PBDCA2_8042700	AAP62320.1	105	5e-23	GH35
2049386020	PBDCA2_8074700	ABJ83806.1	130	8e-31	GH27
2049386375	PBDCA2_8084010	AAD09354.1	73.6	1e-13	GH5
2049388980	PBDCA2_8135180	ACK52447.1	69.7	2e-12	GH103
2049389915	PBDCA2_8158940	ABK01904.1	85.5	3e-17	GH3
2049393206	PBDCA2_8228300	ABI81474.1	192	3e-49	GH4
2049395231	PBDCA2_8272680	ABD82186.1	191	3e-49	GH5
2049396711	PBDCA2_8301890	ABV32788.1	116	2e-26	GH42
2049397585	PBDCA2_8322090	ACL66536.1	117	9e-27	GH77
2049399679	PBDCA2_8362970	ACB68755.1	71.6	5e-13	GH13
2049399711	PBDCA2_8363310	ABI59907.1	471	1e-132	GH94/GT84
2049406358	PBDCA2_8509860	CAN65674.1	71.2	6e-13	GH28
2049406776	PBDCA2_8514050	ABQ05385.1	82.4	3e-16	GH92
2049407003	PBDCA2_8517760	ACL69177.1	291	1e-78	GH30
2049409158	PBDCA2_8564450	CAJ68298.1	109	3e-24	GH18
2049409481	PBDCA2_8573130	ABJ59802.1	107	1e-23	GH3
2049413795	PBDCA2_8664460	ABZ72403.1	159	2e-39	GH43
2049415715	PBDCA2_8703050	ACL75114.1	92	3e-19	GH9
2049417518	PBDCA2_8741390	ACL75903.1	90.5	1e-18	GH26
2049420250	PBDCA2_8803680	ACO47960.1	74.7	6e-14	GH38
2049424362	PBDCA2_8890240	ABY92024.1	76.6	2e-14	GH23
2049425455	PBDCA2_8914730	ABC29754.1	80.9	9e-16	GH16
2049425746	PBDCA2_8922240	EAA63336.1	66.6	2e-11	GH2
2049431310	PBDCA2_9040340	CAN65674.1	104	6e-23	GH28
2049431825	PBDCA2_9046650	ACM06887.1	68.9	3e-12	GH23
2049432402	PBDCA2_9062020	ABR35186.1	65.1	5e-11	GH39
2049433077	PBDCA2_9078360	ABX43720.1	108	5e-24	GH9
2049433141	PBDCA2_9079000	ABZ70433.1	72.8	2e-13	GH3
2049434717	PBDCA2_9113510	ABN52453.1	90.9	7e-19	GH94/GT84
2049435005	PBDCA2_9117660	ABJ84618.1	100	1e-21	GH39
2049435101	PBDCA2_9118620	ABJ83626.1	127	6e-30	GH55
2049435229	PBDCA2_9119900	ACB76240.1	68.6	4e-12	GH35
2049437421	PBDCA2_9166650	CAN65674.1	118	4e-27	GH28
2049445528	PBDCA2_9343310	ABQ70890.1	66.2	2e-11	GH16
2049446110	PBDCA2_9350630	ACR74768.1	69.3	1e-11	GH53
2049448109	PBDCA2_9394650	CAG58981.1	95.5	6e-20	LO3
2049449817	PBDCA2_9430240	ABS65646.1	172	2e-43	GH103
2049454201	PBDCA2_9528870	BAD65808.1	117	6e-27	GH88
2049459146	PBDCA2_9633490	ABX31675.1	109	3e-24	GH94
2049460628	PBDCA2_9662970	AAW20552.1	68.6	8e-12	GH16
2049461044	PBDCA2_9674240	ABR49663.1	134	8e-32	GH94/GT84
2049466801	PBDCA2_9798800	BAG85337.1	116	1e-26	GH13
2049467284	PBDCA2_9803640	AAD52097.1	77.4	1e-13	GH18
2049467380	PBDCA2_9805680	ACR74661.1	80.1	1e-15	GH13
2049473619	PBDCA2_9943290	NP_347548.1	95.1	4e-20	GH5
2049479248	PBDCA2_10063630	ABQ06128.1	112	3e-25	GH2
2049483088	PBDCA2_10142170	ACL77529.1	68.6	4e-12	GH43
2049483865	PBDCA2_10159690	NP_865272.1	99.8	2e-21	GH33
2049485381	PBDCA2_10190370	ACP36454.1	100	2e-21	GH3
2049488506	PBDCA2_10256700	ACL77529.1	91.7	5e-19	GH43
2049491627	PBDCA2_10327310	ACL75653.1	164	6e-41	GH8
2049492012	PBDCA2_10331800	ABD86346.1	107	6e-24	GH103
2049494227	PBDCA2_10378080	ACK42052.1	92	3e-19	GH57
2049494741	PBDCA2_10391860	ABG87579.1	108	6e-24	GH20
2049495094	PBDCA2_10401160	ACJ72869.1	157	8e-39	LO2
2049502156	PBDCA2_10551570	ACL77700.1	158	3e-39	GH94
2049503675	PBDCA2_10582190	ABQ07185.1	98.6	5e-21	GH16
2049506542	PBDCA2_10639620	CAN65674.1	343	5e-94	GH28
2049511304	PBDCA2_10746930	CAN65674.1	83.2	1e-16	GH28
2049511796	PBDCA2_10752120	CAH03074.1	80.5	1e-15	GH13
2049511956	PBDCA2_10754800	ACL74759.1	189	2e-48	GH1
2049512661	PBDCA2_10773500	ACI49189.1	73.2	2e-13	GH13
2049518527	PBDCA2_10899920	ACL76655.1	130	8e-31	GH10
2049520880	PBDCA2_10944200	ACD21120.1	189	8e-48	GH13
2049521008	PBDCA2_10947480	CAJ88203.1	274	8e-74	GH43
2049521170	PBDCA2_10951580	ABZ85483.1	202	2e-52	GH18
2049521461	PBDCA2_10959410	ABL98513.1	109	2e-24	GH2
2049522874	PBDCA2_10987050	CAG81278.1	86.3	4e-17	LO3
2049526772	PBDCA2_11071450	ABM31792.1	92.4	3e-19	GH3
2049527028	PBDCA2_11078400	ACJ00687.1	164	5e-41	GH13
2049529571	PBDCA2_11130550	ABX41086.1	76.6	1e-14	GH3
2049529991	PBDCA2_11137580	CAL54622.1	143	3e-34	GH2
2049531243	PBDCA2_11167760	ACO69312.1	67	1e-11	GH31
2049534424	PBDCA2_11236480	EAA63395.1	71.2	7e-13	GH2
2049536517	PBDCA2_11280330	NP_811345.1	129	2e-30	GH2
2049539310	PBDCA2_11337710	CAZ29389.1	102	5e-22	GH99
2049540728	PBDCA2_11365780	ABN52453.1	110	7e-25	GH94/GT84
2049540764	PBDCA2_11366670	CAN65674.1	152	5e-37	GH28
2049540895	PBDCA2_11370170	ABJ84719.1	122	2e-28	GH51
2049542246	PBDCA2_11397310	AAQ31849.1	360	9e-99	GH26
2049544429	PBDCA2_11445610	NP_636465.1	164	6e-41	GH3
2049549318	PBDCA2_11548140	AAL67138.1	66.6	2e-11	GH94
2049550345	PBDCA2_11574010	CAN93214.1	72	4e-13	GH1
2049558016	PBDCA2_11734710	ACL77529.1	96.7	1e-20	GH43
2049565087	PBDCA2_11885030	BAB20931.1	137	7e-33	GH10
2049565860	PBDCA2_11898650	EAA61743.1	84	2e-16	GH31
2049566982	PBDCA2_11924050	NP_874527.1	70.1	1e-12	GH3
2049567658	PBDCA2_11936960	NP_864910.1	74.7	1e-13	GH43
2049580780	PBDCA2_12221090	AAZ67622.1	183	1e-46	GH13
2049585310	PBDCA2_12312780	ABI68406.1	112	4e-25	GH26
2049585630	PBDCA2_12321170	CAH00655.1	92.4	3e-19	LO3
2049585954	PBDCA2_12329910	ACR12748.1	176	2e-44	GH15
2049587816	PBDCA2_12370120	ABG87409.1	95.5	3e-20	GH38
2049592797	PBDCA2_12474790	ABJ81932.1	142	3e-34	GH36
2049594029	PBDCA2_12498250	NP_420857.1	339	3e-93	GH3
2049594319	PBDCA2_12505880	ACP87340.1	171	8e-43	GH10
2049594703	PBDCA2_12516380	ACM05896.1	67.4	1e-11	GH13
2049596697	PBDCA2_12560130	CAN65674.1	86.3	2e-17	GH28
2049597856	PBDCA2_12581290	ACB75811.1	86.7	2e-17	GH43
2049606707	PBDCA2_12768940	ACI19983.1	196	2e-50	GH78
2049609057	PBDCA2_12823180	ABJ07645.1	144	7e-35	GH13
2049609991	PBDCA2_12838740	ACL23378.1	196	6e-50	GH77
2049610311	PBDCA2_12846940	ABI14440.1	86.3	3e-17	LDA8
2049612046	PBDCA2_12883190	ACL75110.1	311	7e-85	GH9
2049615037	PBDCA2_12947980	ACO34441.1	79.3	2e-15	GH13
2049615330	PBDCA2_12951730	AAW84066.1	394	2e-109	GH28
2049615426	PBDCA2_12954250	ACL77529.1	193	2e-49	GH43
2049616968	PBDCA2_12987160	ABP66001.1	79.7	2e-15	GH105
2049618763	PBDCA2_13025080	ABE37196.1	65.9	3e-11	GH94/GT84
2049619052	PBDCA2_13031300	NP_485101.1	66.2	2e-11	GH65
2049619405	PBDCA2_13040750	ACN15454.1	66.2	3e-11	GH13
2049619605	PBDCA2_13045810	CAN65674.1	151	8e-37	GH28
2049619897	PBDCA2_13053420	ABJ84868.1	135	2e-32	GH95
2049621570	PBDCA2_13089000	ACK72982.1	159	2e-39	GH13
2049622180	PBDCA2_13099540	ABQ07091.1	70.5	1e-12	GH95
2049628318	PBDCA2_13231170	ABC94208.1	210	2e-54	GH88
2049629122	PBDCA2_13249120	CAB38941.1	126	1e-29	GH9
2049629634	PBDCA2_13257070	ABG60675.1	87.4	2e-17	GH8
2049630180	PBDCA2_13271630	ACI97952.1	263	2e-70	GH13
2049632365	PBDCA2_13319710	ABQ92295.1	128	5e-30	GH29
2049637231	PBDCA2_13421620	CAG81278.1	89.4	3e-18	LO3
2049640349	PBDCA2_13485700	ACL77529.1	172	3e-43	GH43
2049641534	PBDCA2_13514180	ABL11223.1	90.9	7e-19	GH44
2049642147	PBDCA2_13524820	ACL77529.1	73.9	9e-14	GH43
2049642307	PBDCA2_13528870	ABQ05768.1	335	3e-92	GH31
2049648999	PBDCA2_13668160	BAA95685.1	77.8	4e-14	GH39
2049653628	PBDCA2_13772800	ABI84370.1	132	2e-31	GH42
2049653821	PBDCA2_13776010	ABJ83644.1	89	3e-18	GH29
2049655334	PBDCA2_13808500	ACQ78448.1	76.6	2e-14	GH15
2049657269	PBDCA2_13850150	ABM04118.1	84	1e-16	GH13
2049659036	PBDCA2_13887990	CAN65674.1	119	1e-27	GH28
2049660656	PBDCA2_13921860	ABR39823.1	96.3	2e-20	GH2
2049662109	PBDCA2_13951400	CAG81278.1	100	2e-21	LO3
2049663394	PBDCA2_13975650	ACO33834.1	96.3	2e-20	GH29
2049664293	PBDCA2_13999440	ABX40917.1	117	1e-26	GH2
2049664487	PBDCA2_14003570	ABR49663.1	68.6	4e-12	GH94/GT84
2049669510	PBDCA2_14110070	AAA51444.1	188	4e-48	GH5
2049674634	PBDCA2_14217540	NP_864910.1	74.3	8e-14	GH43
2049674858	PBDCA2_14223450	ABC45896.1	102	3e-22	GH13
2049675983	PBDCA2_14243960	ABJ86218.1	242	5e-64	GH55
2049679398	PBDCA2_14316120	CAG81278.1	119	4e-27	LO3
2049681459	PBDCA2_14360890	CAN65674.1	149	4e-36	GH28
2049685543	PBDCA2_14450100	BAG15880.1	134	9e-32	GH87
2049688332	PBDCA2_14505270	ABD80655.1	114	3e-25	GH16
2049690040	PBDCA2_14541420	NP_623660.1	80.9	1e-14	GH23
2049692196	PBDCA2_14589600	NP_812867.1	263	2e-70	GH29
2049694187	PBDCA2_14633450	EAA63677.1	82.8	2e-16	GH1/GH95
2049695930	PBDCA2_14669510	ACL44382.1	105	4e-23	GH1
2049701329	PBDCA2_14784540	ABN51514.1	78.6	6e-15	GH94
2049702358	PBDCA2_14805450	ACJ72869.1	95.9	3e-20	LO2
2049702616	PBDCA2_14809590	ACL70805.1	108	8e-24	GH1
2049702809	PBDCA2_14814700	ACL75653.1	243	2e-64	GH8
2049703033	PBDCA2_14820770	ABR45001.1	70.5	2e-12	GH2
2049703482	PBDCA2_14832710	ACR76546.1	174	4e-44	GH94
2049705535	PBDCA2_14877610	ACD21118.1	147	6e-36	GH13
2049706534	PBDCA2_14894960	AAQ44726.1	210	6e-55	GH38
2049709687	PBDCA2_14960220	ABJ81207.1	285	1e-76	GH33
2049711457	PBDCA2_14997620	AAX48919.1	394	4e-109	GH2
2049713583	PBDCA2_15044420	ABJ85566.1	265	6e-71	GH2
2049724128	PBDCA2_15267030	CAN61133.1	82.4	3e-16	GH36
2049725122	PBDCA2_15293360	ABR47854.1	97.8	7e-21	GH77
2049727209	PBDCA2_15334790	ABX42302.1	114	8e-26	GH13
2049731361	PBDCA2_15420580	ACL77529.1	248	9e-66	GH43
2049731521	PBDCA2_15424600	NP_108000.1	142	4e-34	GH25
2049731937	PBDCA2_15436150	ACL74529.1	71.6	7e-13	GH67
2049738047	PBDCA2_15564300	ABD06959.1	119	2e-27	GH13
2049738759	PBDCA2_15578070	BAB49516.1	91.3	7e-19	GH23
2049741239	PBDCA2_15634120	ACA59916.1	87	1e-17	GH23
2049746189	PBDCA2_15735730	ABC62727.1	270	1e-72	GH13
2049750404	PBDCA2_15829420	ABN53021.1	112	2e-25	GH18
2049750885	PBDCA2_15834650	ACJ72869.1	93.6	1e-19	LO2
2049751301	PBDCA2_15845080	ACM03661.1	81.6	4e-16	GH94/GT84
2049753612	PBDCA2_15897260	NP_811824.1	108	5e-24	GH106/GH43
2049754805	PBDCA2_15919170	EAA59449.1	67	2e-11	GH18
2049755673	PBDCA2_15942240	CAN65674.1	83.2	2e-16	GH28
2049760259	PBDCA2_16035140	AAT89101.1	250	9e-67	GH13
2049760355	PBDCA2_16037690	ACO34222.1	215	3e-56	GH39
2049762314	PBDCA2_16080480	CAT16663.1	158	5e-39	GH53
2049762924	PBDCA2_16094660	ACB75560.1	103	1e-22	GH106/CE15
2049767554	PBDCA2_16190450	ABJ81420.1	112	4e-25	GH23
2049771985	PBDCA2_16286110	ACS22117.1	115	3e-26	GH3
2049774553	PBDCA2_16338410	EAA63396.1	80.9	2e-15	GH76
2049775417	PBDCA2_16360470	AAZ97127.1	70.5	1e-12	GH13/GH77
2049775769	PBDCA2_16364000	NP_972334.1	97.4	9e-21	GH2
2049777281	PBDCA2_16399320	ABJ81155.1	164	7e-41	GH18
2049777765	PBDCA2_16404880	EAA62552.1	90.9	3e-18	GH92
2049777989	PBDCA2_16410520	EAA63396.1	68.9	6e-12	GH76
2049779302	PBDCA2_16439920	CAG75913.1	100	1e-21	GH13
2049780527	PBDCA2_16468510	ACB77616.1	188	3e-48	GH115
2049781624	PBDCA2_16488360	BAD76703.1	101	5e-22	GH18
2049788590	PBDCA2_16635310	ABY93066.1	75.9	4e-14	GH13
2049790389	PBDCA2_16674440	ABJ15796.1	118	8e-27	GH16
2049793802	PBDCA2_16746680	NP_810796.1	253	6e-67	GH76
2049800876	PBDCA2_16897610	ABC23373.1	110	1e-24	GH13
2049802392	PBDCA2_16932600	ABX42297.1	151	4e-37	GH94
2049805617	PBDCA2_17001740	BAB64835.1	95.1	4e-20	GH8
2049806616	PBDCA2_17018590	ABW19090.1	157	2e-38	GH18
2049808488	PBDCA2_17058060	ABN52453.1	281	5e-76	GH94/GT84
2049811255	PBDCA2_17121710	ACJ72869.1	111	4e-25	LO2
2049817083	PBDCA2_17239670	EAA64169.1	66.2	2e-11	GH2
2049820911	PBDCA2_17320070	NP_864033.1	131	7e-31	GH78
2049825672	PBDCA2_17425850	BAA76381.1	145	3e-35	GH13
2049826904	PBDCA2_17450530	XP_325455.1	75.1	6e-14	GH71
2049828033	PBDCA2_17470620	ACR74768.1	66.2	5e-11	GH53
2049828289	PBDCA2_17477130	ACL77529.1	80.9	9e-16	GH43
2049832685	PBDCA2_17574820	AAB08046.1	65.9	3e-11	GH10
2049833005	PBDCA2_17579940	ACL76905.1	191	5e-49	GH94/GT84
2049834353	PBDCA2_17609910	ABN53393.1	170	1e-42	GH13
2049834900	PBDCA2_17619170	ABJ81884.1	77.8	6e-15	GH94/GT84
2049837473	PBDCA2_17674070	CAP57869.1	74.7	9e-14	GH23
2049840206	PBDCA2_17733060	ACI19833.1	100	1e-21	GH28
2049841270	PBDCA2_17756980	NP_173761.2	75.9	3e-14	GH28
2049844482	PBDCA2_17822590	NP_420564.1	255	4e-68	GH3
2049844642	PBDCA2_17826800	ABY40380.1	78.2	5e-15	GH18
2049844738	PBDCA2_17829370	CAJ85791.1	76.6	1e-14	LDA6
2049847087	PBDCA2_17881790	ABJ83655.1	108	4e-24	GH67
2049847439	PBDCA2_17886560	CAL93342.1	77	1e-14	GH102
2049849734	PBDCA2_17933880	ACR73094.1	75.1	6e-14	GH23
2049849990	PBDCA2_17940800	CAP49255.1	79	5e-15	LO3
2049851085	PBDCA2_17963310	ABO91205.1	88.2	5e-18	GH94/GT84
2049851407	PBDCA2_17969050	ACP87451.1	83.2	2e-16	GH10
2049853563	PBDCA2_18016340	ACL75354.1	144	1e-34	GH2
2049856233	PBDCA2_18075100	ACQ82285.1	113	1e-25	GH3
2049859225	PBDCA2_18138190	ACL76655.1	90.9	1e-18	GH10
2049865425	PBDCA2_18267630	NP_811824.1	74.3	7e-14	GH106/GH43
2049868679	PBDCA2_18340520	AAL79562.1	64.7	7e-11	GH5
2049870732	PBDCA2_18381240	ABI62666.1	68.2	5e-12	GH23
2049871533	PBDCA2_18399400	ABJ84713.1	196	3e-50	GH78
2049874458	PBDCA2_18459100	ACR74768.1	68.9	2e-11	GH53
2049878187	PBDCA2_18538140	CAQ43452.1	80.5	1e-15	LDA7
2049878573	PBDCA2_18548140	ABX41163.1	180	2e-45	GH88
2049878701	PBDCA2_18551680	ABU56929.1	214	7e-56	GH57
2049878893	PBDCA2_18556720	ABJ01894.1	113	2e-25	GH58
2049879890	PBDCA2_18573810	ACB75560.1	214	4e-55	GH106/CE15
2049882274	PBDCA2_18626860	ACL69174.1	76.6	2e-14	GH81
2049883016	PBDCA2_18644550	ABE64342.1	92	4e-19	GH15
2049886695	PBDCA2_18721370	AAC45511.1	127	7e-30	GH94
2049892561	PBDCA2_18842520	ABK47662.1	80.1	3e-15	GH109
2049896450	PBDCA2_18927780	ABN52453.1	75.9	2e-14	GH94/GT84
2049897059	PBDCA2_18944170	CAG81278.1	73.2	2e-13	LO3
2049897829	PBDCA2_18954950	ACL77529.1	326	4e-89	GH43
2049898565	PBDCA2_18974700	ACK93728.1	104	7e-23	GH18/GT2/CE4
2049899269	PBDCA2_18988330	ABY92063.1	71.2	7e-13	GH66
2049007028	PBDCA2_23310	AAA23230.1	190	1e-48	GH5
2049012377	PBDCA2_136410	ACM38666.1	200	1e-51	GH13
2049012537	PBDCA2_140830	ABR43079.1	121	4e-28	GH78
2049018472	PBDCA2_264440	ABJ83626.1	107	7e-24	GH55
2049018536	PBDCA2_265080	ABP67154.1	79	3e-15	GH4
2049020625	PBDCA2_307210	EAA62552.1	73.6	1e-13	GH92
2049023392	PBDCA2_370950	CAI79477.1	99	3e-21	GH10
2049025998	PBDCA2_420410	ABR37905.1	122	4e-27	GH28
2049027351	PBDCA2_453510	ABN13675.1	68.6	4e-12	GH2
2049028992	PBDCA2_490360	ACL74764.1	108	3e-24	GH5
2049029056	PBDCA2_491000	BAE51343.1	82.4	3e-16	GH23
2049030056	PBDCA2_509020	NP_641621.1	158	8e-39	GH51
2049034837	PBDCA2_609880	CAP49255.1	77.8	7e-15	LO3
2049035477	PBDCA2_623410	ABN52659.1	243	3e-64	GH1
2049036733	PBDCA2_649340	CAA90745.1	68.6	5e-12	GH10/CE4
2049038600	PBDCA2_688430	CAN60684.1	72	5e-12	GH18
2049040825	PBDCA2_737210	ACM53929.1	68.9	3e-12	GH39
2049041633	PBDCA2_758340	ACO32993.1	70.9	9e-13	GH36
2049042471	PBDCA2_771250	ACJ72869.1	85.9	3e-17	LO2
2049042632	PBDCA2_775490	CAH00655.1	71.2	1e-12	LO3
2049043244	PBDCA2_791580	ABE34447.1	204	5e-53	GH94/GT84
2049043660	PBDCA2_799280	ABP60301.1	117	6e-27	GH3
2049044783	PBDCA2_823290	NP_386031.1	120	1e-27	GH2
2049050435	PBDCA2_945220	ABQ07435.1	99	3e-21	GH66
2049050467	PBDCA2_946070	CAG81278.1	71.2	6e-13	LO3
2049051115	PBDCA2_954600	ABZ73922.1	169	2e-41	GH16
2049052369	PBDCA2_986890	NP_864910.1	95.1	5e-20	GH43
2049054133	PBDCA2_1024480	CAN91990.1	90.9	8e-19	GH30
2049056002	PBDCA2_1063440	ABB06584.1	123	1e-28	GH2
2049062279	PBDCA2_1195120	CAY52587.1	172	5e-43	GH103
2049063048	PBDCA2_1214920	ACL76454.1	189	1e-48	GH94
2049065461	PBDCA2_1260430	ABJ85806.1	308	5e-84	GH28
2049066494	PBDCA2_1287750	ABY92392.1	141	5e-34	GH36
2049068944	PBDCA2_1334400	ABR35882.1	671	0	GH3
2049070390	PBDCA2_1369000	NP_420564.1	172	3e-43	GH3
2049071003	PBDCA2_1378140	NP_926176.1	129	1e-30	GH1
2049072126	PBDCA2_1406760	ACG78884.1	145	3e-35	GH67
2049073831	PBDCA2_1443840	NP_812596.1	142	2e-34	GH43
2049075246	PBDCA2_1472220	ABG57307.1	79.7	2e-15	GH3
2049075406	PBDCA2_1476310	NP_562792.1	70.5	1e-12	GH29
2049077096	PBDCA2_1511150	ABC80851.1	142	2e-34	GH57
2049082121	PBDCA2_1616930	CAN65674.1	77	1e-14	GH28
2049083961	PBDCA2_1656050	EAA63396.1	82.8	2e-16	GH76
2049084121	PBDCA2_1660510	CAJ85791.1	96.3	2e-20	LDA6
2049085629	PBDCA2_1691110	ABR44771.1	194	7e-50	GH43
2049085693	PBDCA2_1692940	ABI71160.1	116	2e-26	GH3
2049088300	PBDCA2_1750440	ABC80070.1	73.6	1e-13	GH77
2049090461	PBDCA2_1791750	ABV42383.1	70.5	1e-12	GH94/GT84
2049092069	PBDCA2_1827520	NP_810682.1	80.9	9e-16	GH92
2049092133	PBDCA2_1828160	AAV89278.1	68.9	3e-12	GH18/GT2/CE4
2049092519	PBDCA2_1834530	ABQ36152.1	162	3e-40	GH1
2049099370	PBDCA2_1980920	ACL75611.1	64.7	6e-11	GH51
2049107350	PBDCA2_2151630	ACK49207.1	147	9e-36	GH13
2049108125	PBDCA2_2169040	ABP45478.1	71.6	5e-13	GH18/GH5
2049113731	PBDCA2_2285140	ABA58092.1	85.1	4e-17	GH15
2049115247	PBDCA2_2320100	CAN65674.1	71.6	6e-13	GH28
2049119852	PBDCA2_2413970	ABQ92457.1	112	4e-25	GH4
2049120176	PBDCA2_2422660	BAA95685.1	67	1e-11	GH39
2049121789	PBDCA2_2456280	CAL84892.1	178	7e-45	GH94/GT84
2049122850	PBDCA2_2477100	ACK72982.1	70.5	1e-12	GH13
2049124951	PBDCA2_2521340	EAA62552.1	65.9	3e-11	GH92
2049125886	PBDCA2_2546140	ACO34441.1	131	4e-31	GH13
2049127825	PBDCA2_2587540	ACB09961.1	86.3	2e-17	GH2
2049134156	PBDCA2_2719930	ABN52488.1	160	9e-40	GH3
2049135155	PBDCA2_2741190	ABC23094.1	124	8e-29	GH13
2049136218	PBDCA2_2765520	ABD03104.1	136	2e-32	GH13
2049137948	PBDCA2_2801960	BAC16750.1	210	1e-54	GH3
2049142988	PBDCA2_2904940	NP_469379.1	130	1e-30	GH9
2049143696	PBDCA2_2924020	ABJ85468.1	157	5e-39	GH13
2049144985	PBDCA2_2949010	ABG50626.1	144	8e-35	GH77
2049145433	PBDCA2_2960790	ABX07093.1	147	1e-35	GH57
2049145726	PBDCA2_2967940	ABS14190.1	129	2e-30	GH2
2049148038	PBDCA2_3011650	NP_357049.1	102	1e-21	GH16
2049149066	PBDCA2_3038690	NP_864910.1	73.2	2e-13	GH43
2049150030	PBDCA2_3054930	BAG89337.1	135	2e-32	GH3
2049152636	PBDCA2_3114490	AAO88279.1	73.9	1e-13	GH111
2049154894	PBDCA2_3161180	ABB74486.1	97.8	7e-21	GH94
2049157155	PBDCA2_3205500	AAW30979.1	94.4	3e-19	GH23
2049164194	PBDCA2_3355000	ABR42311.1	850	0	GH97
2049165350	PBDCA2_3385390	AAZ33385.1	106	2e-23	GH39
2049165999	PBDCA2_3393430	NP_813578.1	1268	0	GH2
2049168123	PBDCA2_3439710	XP_331443.1	141	9e-34	GH93
2049178526	PBDCA2_3658960	ABA56022.1	177	2e-44	GH12
2049179042	PBDCA2_3671530	ACC79009.1	84.3	1e-16	GH1
2049180519	PBDCA2_3702070	BAB49516.1	82	7e-16	GH23
2049180616	PBDCA2_3704670	EAA62552.1	73.2	2e-13	GH92
2049184265	PBDCA2_3782160	ABL11223.1	183	2e-46	GH44
2049184747	PBDCA2_3795050	ABJ07582.1	182	2e-46	GH94/GT84
2049184877	PBDCA2_3798450	ABC78593.1	76.3	2e-14	GH13
2049186164	PBDCA2_3822650	NP_785303.1	89	3e-18	GH65
2049188731	PBDCA2_3881030	ACR12726.1	133	1e-31	GH9
2049194395	PBDCA2_3998210	ABD26159.1	85.1	5e-17	GH3
2049195005	PBDCA2_4009590	ACI19983.1	135	6e-32	GH78
2049196839	PBDCA2_4048500	CAP49255.1	87.8	1e-17	LO3
2049197384	PBDCA2_4063420	EAA58990.1	71.2	6e-13	GH71
2049200534	PBDCA2_4128460	CAL76792.1	151	5e-37	GH23
2049208127	PBDCA2_4291870	ABE37196.1	184	7e-47	GH94/GT84
2049208833	PBDCA2_4304170	ABP45478.1	111	5e-25	GH18/GH5
2049212051	PBDCA2_4376680	AAW49296.1	80.5	1e-15	GH10
2049213437	PBDCA2_4404890	ABM24356.1	67	1e-11	GH109
2049214081	PBDCA2_4417320	ACR77113.1	136	1e-32	GH36
2049215239	PBDCA2_4443380	EAA63395.1	109	3e-24	GH2
2049219530	PBDCA2_4533490	NP_810681.1	77.8	7e-15	GH2
2049219979	PBDCA2_4541490	ACK98509.1	75.1	5e-14	GH23
2049221680	PBDCA2_4577230	ABD03104.1	166	4e-41	GH13
2049222033	PBDCA2_4586640	ABJ88511.1	315	5e-86	GH31
2049225094	PBDCA2_4650210	CAX84106.1	136	4e-32	GH108
2049225513	PBDCA2_4660670	ABG60675.1	70.1	3e-12	GH8
2049229322	PBDCA2_4742480	ACJ32917.1	231	7e-61	GH51
2049231824	PBDCA2_4797580	CAN65674.1	86.7	1e-17	GH28
2049235590	PBDCA2_4875830	ABX21186.1	74.7	6e-14	GH13
2049240565	PBDCA2_4984360	NP_420857.1	147	9e-36	GH3
2049244327	PBDCA2_5064050	ABW28190.1	65.9	3e-11	GH16
2049244968	PBDCA2_5072150	ABV10983.1	76.3	2e-14	GH20
2049245258	PBDCA2_5079850	NP_948681.1	140	2e-33	GH39
2049246859	PBDCA2_5112660	ABJ81207.1	88.2	7e-18	GH33
2049248826	PBDCA2_5155050	ABX43668.1	208	5e-54	GH65
2049257762	PBDCA2_5344440	ABR36782.1	191	6e-49	GH3
2049260182	PBDCA2_5398460	ABG41155.1	86.3	2e-17	GH50
2049264460	PBDCA2_5485920	AAC45510.1	83.2	2e-16	GH94
2049265522	PBDCA2_5512070	CAH00655.1	93.2	2e-19	LO3
2049265714	PBDCA2_5516930	ACG74515.1	93.6	1e-19	GH94/GT84
2049269118	PBDCA2_5588400	ABU58632.1	135	2e-32	GH29
2049273307	PBDCA2_5674520	ABD03104.1	97.4	7e-21	GH13
2049275016	PBDCA2_5711570	ABN53393.1	84.7	5e-17	GH13
2049277533	PBDCA2_5763510	BAF87299.1	118	3e-27	GH5
2049279978	PBDCA2_5819020	NP_149217.1	193	8e-50	GH10
2049280591	PBDCA2_5827830	NP_642837.1	69.3	2e-12	GH9
2049282041	PBDCA2_5862710	CAA47161.1	66.6	1e-11	GH2
2049283940	PBDCA2_5901830	CAH00655.1	79.7	2e-15	LO3
2049284388	PBDCA2_5907960	ACI97953.1	202	6e-52	GH13
2049287384	PBDCA2_5976030	ACP87300.1	94.7	5e-20	GH10
2049289313	PBDCA2_6015230	ACH37845.1	86.7	2e-17	GH13
2049289509	PBDCA2_6017200	NP_213496.1	76.3	2e-14	GH13
2049289865	PBDCA2_6024450	ACN28438.1	108	6e-24	GH28
2049291531	PBDCA2_6059670	ACL75469.1	121	5e-28	GH18
2049291791	PBDCA2_6066650	ACL75354.1	132	3e-31	GH2
2049293490	PBDCA2_6102120	AAB08046.1	84.3	1e-16	GH10
2049294133	PBDCA2_6119420	NP_865272.1	108	5e-24	GH33
2049295869	PBDCA2_6156070	BAH74799.1	122	4e-28	GH2/GT2
2049298800	PBDCA2_6214800	NP_242774.1	94.7	6e-20	GH3
2049303945	PBDCA2_6323670	ACI18200.1	222	2e-57	GH3
2049305782	PBDCA2_6363130	CAN61133.1	83.6	1e-16	GH36
2049308007	PBDCA2_6413210	ACG78884.1	263	1e-70	GH67
2049309455	PBDCA2_6442300	ABQ07093.1	108	1e-23	GH78
2049310550	PBDCA2_6470390	ABU57036.1	68.9	4e-12	GH78
2049310649	PBDCA2_6471380	ABG86644.1	149	1e-36	GH42
2049312192	PBDCA2_6505840	CAL67097.1	166	2e-41	GH13
2049314278	PBDCA2_6547830	ACL70061.1	78.6	4e-15	GH2
2049321102	PBDCA2_6694510	NP_855016.1	169	2e-42	GH13
2049322098	PBDCA2_6713250	CAZ29389.1	90.1	3e-18	GH99
2049324871	PBDCA2_6772530	ACC81583.1	106	1e-23	GH15
2049326699	PBDCA2_6811380	CAA61884.2	69.7	2e-12	GH16
2049329273	PBDCA2_6865370	ABF39901.1	154	7e-38	GH31
2049333067	PBDCA2_6947180	XP_331443.1	70.5	1e-12	GH93
2049334285	PBDCA2_6969710	ACR74768.1	82.8	4e-16	GH53
2049336113	PBDCA2_7009070	CAD73141.1	85.9	5e-17	GH33
2049336145	PBDCA2_7009940	AAW20552.1	67.8	1e-11	GH16
2049338273	PBDCA2_7057200	AAF79504.1	103	2e-22	GH36
2049339107	PBDCA2_7075380	ACB74447.1	88.2	6e-18	GH53
2049344090	PBDCA2_7184780	ACO34569.1	79	3e-15	GH31
2049346470	PBDCA2_7230190	AAO33832.1	276	1e-73	GH20
2049348440	PBDCA2_7272080	ABQ07432.1	105	8e-23	GH65
2049348792	PBDCA2_7281660	ACI97975.1	95.1	5e-20	GH17/GT2
2049349149	PBDCA2_7291120	CAG58981.1	101	6e-22	LO3
2049351302	PBDCA2_7338500	ACJ72869.1	115	2e-26	LO2
2049351432	PBDCA2_7339800	BAE55581.1	69.7	2e-12	LDA6
2049355748	PBDCA2_7429100	ABA05048.1	208	7e-54	GH17
2049357490	PBDCA2_7466370	NP_864910.1	70.5	1e-12	GH43
2049358516	PBDCA2_7490520	AAF31169.1	68.9	3e-12	LDA1
2049358776	PBDCA2_7493120	ABE37196.1	81.3	6e-16	GH94/GT84
2049359292	PBDCA2_7504530	ACQ81123.1	231	5e-61	GH2
2049360065	PBDCA2_7525090	ABX43668.1	157	8e-39	GH65
2049362893	PBDCA2_7581140	BAE55581.1	108	3e-24	LDA6
2049362925	PBDCA2_7581920	ABD80053.1	122	3e-28	GH43
2049364792	PBDCA2_7621920	ABW02483.1	147	1e-35	GH31
2049369165	PBDCA2_7715970	ABJ84437.1	111	4e-25	GH29
2049369487	PBDCA2_7719190	CAN65674.1	503	7e-142	GH28
2049370711	PBDCA2_7750850	ABO50835.1	132	2e-31	GH57
2049372099	PBDCA2_7778300	ACI97952.1	246	2e-65	GH13
2049373130	PBDCA2_7796430	BAA95685.1	66.6	3e-11	GH39
2049373679	PBDCA2_7810980	ACM61441.1	72.8	2e-13	GH43
2049377459	PBDCA2_7893190	ACL77529.1	155	3e-38	GH43
2049384346	PBDCA2_8039000	BAE51343.1	145	4e-35	GH23
2049387947	PBDCA2_8116140	ACR74768.1	65.9	3e-11	GH53
2049390532	PBDCA2_8171020	ABX42302.1	114	8e-26	GH13
2049396781	PBDCA2_8303800	CAB53341.1	113	1e-25	GH78
2049397261	PBDCA2_8316760	ABN52453.1	95.5	3e-20	GH94/GT84
2049397426	PBDCA2_8320500	ACM05593.1	100	9e-22	GH15
2049398004	PBDCA2_8327270	ABV32788.1	115	1e-25	GH42
2049399712	PBDCA2_8363330	CAD60736.1	137	3e-32	LO3
2049401814	PBDCA2_8408720	ACL77529.1	89	6e-18	GH43
2049402713	PBDCA2_8432880	ACG78481.1	73.2	2e-13	GH1
2049405746	PBDCA2_8494710	ABY95559.1	209	4e-54	GH2
2049406745	PBDCA2_8513740	ACL69177.1	95.9	2e-20	GH30
2049408486	PBDCA2_8551450	ABN52453.1	91.7	5e-19	GH94/GT84
2049408583	PBDCA2_8552420	CAD48308.1	82.4	3e-16	GH39
2049410063	PBDCA2_8587630	NP_421599.1	107	1e-23	GH10
2049412056	PBDCA2_8627000	ABJ83655.1	128	3e-30	GH67
2049418325	PBDCA2_8761130	ABP88927.1	112	5e-25	GH25
2049425617	PBDCA2_8918990	ACJ72869.1	89.4	2e-18	LO2
2049430735	PBDCA2_9026640	ABA06275.1	172	2e-43	GH15
2049431535	PBDCA2_9042590	ACR74834.1	124	6e-29	GH94
2049435360	PBDCA2_9121530	DAA01336.1	72.4	3e-12	GH18
2049439219	PBDCA2_9205160	ABK52198.1	83.2	3e-16	GH18
2049441342	PBDCA2_9253200	NP_813063.1	155	2e-38	GH42/GH43
2049442659	PBDCA2_9278200	ABG03051.1	135	5e-32	GH38
2049442787	PBDCA2_9281570	AAD09354.1	75.5	7e-14	GH5
2049444917	PBDCA2_9328800	ACB73617.1	74.7	6e-14	GH62
2049448110	PBDCA2_9394680	ABQ46970.1	168	3e-42	GH1
2049449334	PBDCA2_9422110	ACK50112.1	74.7	6e-14	GH102
2049449366	PBDCA2_9422430	BAB49516.1	69.3	2e-12	GH23
2049450176	PBDCA2_9439670	EAM56297.1	112	2e-25	GH109
2049452496	PBDCA2_9492810	ABZ70671.1	63.9	1e-10	GH29
2049453168	PBDCA2_9501550	DAA01336.1	82.8	6e-15	GH18
2049455199	PBDCA2_9545390	CAD78312.1	115	3e-26	GH33
2049460210	PBDCA2_9652740	ACL74542.1	65.9	2e-11	GH2
2049460853	PBDCA2_9669160	ABJ83069.1	251	6e-67	GH32
2049462173	PBDCA2_9694890	ACR74768.1	82.8	4e-16	GH53
2049464522	PBDCA2_9748410	CAI43283.4	70.5	1e-12	LDA6
2049464747	PBDCA2_9754370	ACL74441.1	233	7e-62	GH13
2049464971	PBDCA2_9760140	ACJ72869.1	69.7	2e-12	LO2
2049467608	PBDCA2_9811660	BAB49516.1	80.5	2e-15	GH23
2049472077	PBDCA2_9911240	ACL75614.1	122	2e-28	GH8
2049473138	PBDCA2_9929940	NP_809371.1	66.2	4e-11	GH2
2049474617	PBDCA2_9960510	ABF46051.1	117	2e-26	GH26
2049476038	PBDCA2_9991190	AAU43089.1	85.5	3e-17	GH53
2049480608	PBDCA2_10091320	ACL74542.1	99	3e-21	GH2
2049480839	PBDCA2_10097320	ACI19833.1	84	1e-16	GH28
2049481063	PBDCA2_10101840	ABX43682.1	96.7	2e-20	GH3
2049481930	PBDCA2_10117230	EAA62552.1	68.2	8e-12	GH92
2049482929	PBDCA2_10140580	CAN01443.1	120	6e-28	GH13
2049483482	PBDCA2_10149700	NP_813003.1	138	4e-33	GH92
2049485574	PBDCA2_10195810	ABR39484.1	67.4	1e-11	GH2
2049485993	PBDCA2_10206840	ABJ86506.1	125	3e-29	GH78
2049488219	PBDCA2_10253830	NP_782714.1	136	2e-32	GH3
2049489088	PBDCA2_10270050	ABY95679.1	68.9	3e-12	GH3
2049489312	PBDCA2_10275800	ABB43117.1	77	2e-14	GH36
2049489696	PBDCA2_10285890	ACL70349.1	142	2e-34	GH57
2049490400	PBDCA2_10296110	ABY94171.1	68.6	4e-12	GH94/GT84
2049490921	PBDCA2_10308510	ABD81763.1	95.1	7e-20	GH95
2049491273	PBDCA2_10318100	BAE56069.1	71.2	7e-13	LO1
2049497449	PBDCA2_10447250	ABJ85566.1	70.5	1e-12	GH2
2049498253	PBDCA2_10466840	NP_644526.1	239	2e-63	GH67
2049500381	PBDCA2_10513920	ABW25914.1	100	8e-22	GH113
2049503580	PBDCA2_10579500	EAA61743.1	71.6	8e-13	GH31
2049504222	PBDCA2_10595490	ACA43820.1	75.1	4e-14	GH94/GT84
2049511537	PBDCA2_10749530	CAN65674.1	66.2	2e-11	GH28
2049518979	PBDCA2_10904480	AAD52097.1	87.4	2e-16	GH18
2049521171	PBDCA2_10951610	ABZ85378.1	65.1	4e-11	GH18
2049521430	PBDCA2_10958540	ABD80655.1	75.9	2e-14	GH16
2049522422	PBDCA2_10978980	CAJ68298.1	87.8	6e-18	GH18
2049524034	PBDCA2_11015080	AAR96047.1	75.9	3e-14	GH78
2049525195	PBDCA2_11039080	NP_782983.1	182	3e-46	GH94/GT84
2049525937	PBDCA2_11053890	ABR41450.1	86.3	2e-17	GH2
2049526677	PBDCA2_11068910	ABE60714.1	66.6	1e-11	GH5
2049528803	PBDCA2_11115510	NP_623886.1	71.6	5e-13	GH30
2049529637	PBDCA2_11131210	ACQ71422.1	67.4	9e-12	GH13
2049531116	PBDCA2_11166490	ABE37196.1	72	3e-13	GH94/GT84
2049533977	PBDCA2_11224610	AAF79504.1	106	2e-23	GH36
2049535523	PBDCA2_11256060	NP_864910.1	72.8	2e-13	GH43
2049537324	PBDCA2_11294410	BAF87299.1	271	6e-73	GH5
2049543559	PBDCA2_11430390	ACR79206.1	118	5e-27	GH92
2049544398	PBDCA2_11444890	AAM25311.1	92	3e-19	GH94/GT84
2049546460	PBDCA2_11490310	ACN28438.1	113	2e-25	GH28
2049548615	PBDCA2_11537680	BAE60251.1	76.3	2e-14	GH3
2049548871	PBDCA2_11543670	ACL75469.1	104	6e-23	GH18
2049549898	PBDCA2_11561930	AAP58539.1	159	3e-39	GH94/GT84
2049550218	PBDCA2_11570630	ACR76485.1	72.8	2e-13	GH24
2049553978	PBDCA2_11651500	ABP66077.1	105	2e-23	GH65
2049554174	PBDCA2_11656230	CAD48309.1	116	2e-26	GH3
2049554496	PBDCA2_11659460	ACL24981.1	80.9	7e-16	GH13
2049555498	PBDCA2_11682230	ACI19519.1	219	3e-57	GH31
2049557241	PBDCA2_11718430	ACL70723.1	223	1e-58	GH94
2049560749	PBDCA2_11792250	ACB74651.1	163	2e-40	GH43
2049562228	PBDCA2_11821790	NP_469498.1	102	3e-22	GH18
2049564928	PBDCA2_11883140	AAT89163.1	126	1e-29	GH15
2049565152	PBDCA2_11885680	ACO47960.1	88.2	6e-18	GH38
2049567399	PBDCA2_11930210	CAN91404.1	120	1e-27	GH43
2049569171	PBDCA2_11968280	ABR41450.1	134	1e-31	GH2
2049569655	PBDCA2_11980850	NP_662963.1	141	8e-34	GH13
2049570585	PBDCA2_12000210	ABC98618.1	107	7e-24	GH13
2049571899	PBDCA2_12031620	ABG59531.1	144	4e-35	GH3
2049581678	PBDCA2_12235420	ACL70061.1	77.4	1e-14	GH2
2049584889	PBDCA2_12304720	ACR31908.1	87.8	7e-18	GH13
2049586051	PBDCA2_12332520	CAH06255.1	163	1e-40	GH31
2049587945	PBDCA2_12373540	ACK51385.1	179	1e-45	GH94
2049590707	PBDCA2_12427660	ACR12410.1	73.6	1e-13	GH9
2049592157	PBDCA2_12457950	BAD76703.1	77.8	1e-14	GH18
2049592573	PBDCA2_12468620	AAY80547.1	120	7e-28	GH57
2049593539	PBDCA2_12491540	CAH06059.1	99.8	2e-21	GH2
2049596026	PBDCA2_12541970	ABN52453.1	151	9e-37	GH94/GT84
2049597665	PBDCA2_12576420	EAA62552.1	70.9	7e-13	GH92
2049599624	PBDCA2_12618640	ABJ57618.1	213	1e-55	GH13
2049604264	PBDCA2_12718530	ABR36550.1	108	4e-24	GH36
2049608545	PBDCA2_12809090	ACJ34384.1	130	1e-30	GH65
2049609218	PBDCA2_12827420	BAH46778.1	66.2	2e-11	GH63
2049618571	PBDCA2_13023160	ABJ86298.1	142	3e-34	GH95
2049623335	PBDCA2_13127170	ABR89681.1	161	4e-40	GH94/GT84
2049624978	PBDCA2_13161060	ABQ05385.1	226	1e-59	GH92
2049628961	PBDCA2_13247510	ABA72832.1	67.8	8e-12	GH17/GT2
2049629347	PBDCA2_13251370	ABR44729.1	64.7	5e-11	GH2
2049630438	PBDCA2_13278530	BAF87299.1	64.7	6e-11	GH5
2049632851	PBDCA2_13326190	CAN93211.1	64.7	6e-11	GH2
2049638649	PBDCA2_13449190	ACS24277.1	98.6	7e-21	GH2
2049639354	PBDCA2_13468030	ACA43820.1	240	8e-64	GH94/GT84
2049641987	PBDCA2_13520440	ACM59590.1	157	9e-39	GH1
2049643471	PBDCA2_13553070	ACB59860.1	89	3e-18	GH36
2049644854	PBDCA2_13586900	ACL45985.1	78.2	5e-15	GH38
2049645847	PBDCA2_13603960	XP_360730.1	66.2	2e-11	GH38
2049650794	PBDCA2_13706900	EAA62552.1	65.9	7e-11	GH92
2049651020	PBDCA2_13712730	ACM12601.1	162	6e-40	GH78
2049666034	PBDCA2_14036520	BAE51343.1	122	2e-28	GH23
2049666610	PBDCA2_14045330	CAA33665.1	80.1	2e-15	GH3
2049671188	PBDCA2_14145870	CAV27498.1	196	2e-50	GH94
2049675984	PBDCA2_14243990	ABH79166.1	103	1e-22	GH5
2049676500	PBDCA2_14257660	ACN28438.1	113	2e-25	GH28
2049678466	PBDCA2_14300380	ABX06967.1	64.3	8e-11	GH13
2049680723	PBDCA2_14346370	ABR35984.1	66.2	2e-11	GH32
2049680851	PBDCA2_14347650	ABF52736.1	78.6	4e-15	GH1
2049685351	PBDCA2_14444850	CAN65674.1	135	3e-32	GH28
2049687050	PBDCA2_14480820	ABG87849.1	123	3e-28	GH2
2049689557	PBDCA2_14535950	ABQ28483.1	137	9e-33	GH94/GT84
2049707435	PBDCA2_14917040	ABZ73922.1	71.6	5e-13	GH16
2049708012	PBDCA2_14925350	BAD49809.1	69.3	5e-12	GH51
2049708076	PBDCA2_14927020	ACJ72867.1	82	4e-16	LO2
2049709688	PBDCA2_14960240	BAD50678.1	659	0	GH33
2049710492	PBDCA2_14981330	CAD73939.1	72.4	3e-13	GH95
2049713102	PBDCA2_15033980	NP_347247.1	97.8	6e-21	GH94
2049715158	PBDCA2_15076150	CAN61133.1	73.2	2e-13	GH36
2049715609	PBDCA2_15088200	ABY94276.1	166	1e-41	GH38
2049719408	PBDCA2_15170200	ABP66714.1	170	1e-42	GH3
2049719632	PBDCA2_15176060	CAI79477.1	97.4	7e-21	GH10
2049724129	PBDCA2_15267040	ABR49663.1	72.8	2e-13	GH94/GT84
2049726248	PBDCA2_15313810	ACR62057.1	71.6	4e-13	GH2
2049729268	PBDCA2_15375230	CAN60684.1	84	6e-16	GH18
2049730688	PBDCA2_15409550	ABQ04594.1	121	4e-28	GH30
2049731072	PBDCA2_15413580	XP_325455.1	85.9	3e-16	GH71
2049736958	PBDCA2_15539920	ABW17626.1	65.1	8e-11	GH39
2049737374	PBDCA2_15551280	ABR89681.1	96.7	1e-20	GH94/GT84
2049738307	PBDCA2_15567030	AAQ44650.1	75.5	2e-13	GH73
2049744260	PBDCA2_15694140	CAG81278.1	96.3	3e-20	LO3
2049747959	PBDCA2_15773890	CAL74450.1	142	3e-34	GH13
2049748665	PBDCA2_15791850	ACR75145.1	129	1e-30	GH2
2049760453	PBDCA2_16040350	ACL22720.1	65.9	4e-11	GH18
2049761995	PBDCA2_16072030	ACI49189.1	71.2	6e-13	GH13
2049769867	PBDCA2_16242730	ABO50835.1	126	2e-29	GH57
2049771954	PBDCA2_16285800	ABR49663.1	105	4e-23	GH94/GT84
2049785123	PBDCA2_16562230	ABQ05056.1	137	1e-32	GH43
2049786632	PBDCA2_16594040	BAA95685.1	78.2	6e-15	GH39
2049788527	PBDCA2_16633590	ABC45027.1	72.4	1e-12	GH3
2049793803	PBDCA2_16746700	NP_812042.1	391	4e-108	GH92
2049802393	PBDCA2_16932610	ABY24424.1	80.5	1e-15	GH95
2049803999	PBDCA2_16967990	AAT02980.1	92.4	2e-19	GH31
2049809518	PBDCA2_17083690	ACC78926.1	118	3e-27	GH57
2049810838	PBDCA2_17111210	ABN54008.1	70.1	2e-12	GH16
2049812381	PBDCA2_17142590	ACB76939.1	77.8	1e-14	GH10
2049819529	PBDCA2_17293430	ABW02990.1	147	7e-36	GH16
2049825545	PBDCA2_17423550	ACL70722.1	69.7	2e-12	GH94
2049826290	PBDCA2_17434010	NP_242921.1	76.6	2e-14	GH31
2049830668	PBDCA2_17530740	CAF23830.1	112	5e-25	GH13
2049831180	PBDCA2_17541330	ABU57016.1	65.5	4e-11	GH3
2049832974	PBDCA2_17579630	ABR39829.1	102	3e-22	GH28
2049833070	PBDCA2_17580590	CAJ73823.1	94.4	6e-20	GH13
2049833744	PBDCA2_17593420	NP_812211.1	201	8e-52	GH31
2049833840	PBDCA2_17595900	ABF39333.1	157	1e-38	GH51
2049836186	PBDCA2_17649360	ACK98509.1	76.6	1e-14	GH23
2049836378	PBDCA2_17654320	ABQ07957.1	150	7e-37	GH5
2049842106	PBDCA2_17772190	ABX43741.1	96.3	2e-20	GH16
2049845029	PBDCA2_17837370	ABR42751.1	126	1e-29	GH2
2049847504	PBDCA2_17887210	ABN52453.1	98.6	3e-21	GH94/GT84
2049848122	PBDCA2_17899910	ABL80248.1	84	2e-16	GH5
2049850443	PBDCA2_17952670	ABQ04599.1	136	2e-32	GH3
2049851632	PBDCA2_17974960	ABA56022.1	116	2e-26	GH12
2049852689	PBDCA2_17999700	ABR35186.1	67	1e-11	GH39
2049858425	PBDCA2_18117580	NP_812205.1	67	1e-10	GH2
2049863501	PBDCA2_18227710	ABZ72749.1	84.7	5e-17	GH3
2049868035	PBDCA2_18325990	EAA61743.1	99	5e-21	GH31
2049869001	PBDCA2_18343740	ACL75615.1	78.2	5e-15	GH39
2049869450	PBDCA2_18353680	ABJ76756.1	77.4	1e-14	GH36
2049871694	PBDCA2_18404040	ABY40380.1	131	5e-31	GH18
2049874235	PBDCA2_18456790	ABF87741.1	76.3	2e-14	GH57
2049876998	PBDCA2_18516000	NP_624805.1	120	1e-27	GH78
2049877640	PBDCA2_18530480	ABP71312.1	65.9	3e-11	GH16
2049879891	PBDCA2_18573830	NP_811824.1	273	1e-72	GH106/GH43
2049881923	PBDCA2_18617300	CAL13228.1	251	8e-67	GH94/GT84
2049881987	PBDCA2_18619000	ABF52734.1	142	3e-34	GH2
2049884079	PBDCA2_18666000	ABJ83668.1	74.7	5e-14	GH3
2049889952	PBDCA2_18793120	ABR41798.1	129	2e-30	GH77
2049890593	PBDCA2_18801040	ABD40448.1	171	4e-42	GH39
2049890758	PBDCA2_18805100	ACN95943.1	111	1e-24	GH25
2049007674	PBDCA2_35710	NP_484212.1	72	3e-13	GH13
2049008058	PBDCA2_40910	CAN65674.1	199	7e-51	GH28
2049010417	PBDCA2_94270	NP_864033.1	108	5e-24	GH78
2049011608	PBDCA2_116430	ACB75560.1	548	4e-155	GH106/CE15
2049014079	PBDCA2_171530	ABV61269.1	77.4	1e-14	GH23
2049014594	PBDCA2_184780	CAF32985.1	155	3e-38	GH13
2049015269	PBDCA2_193190	ABR44845.1	392	1e-108	GH78
2049015878	PBDCA2_209430	ABN52453.1	149	4e-36	GH94/GT84
2049019049	PBDCA2_274890	EAA61743.1	89	3e-18	GH31
2049019433	PBDCA2_285110	NP_718681.1	75.9	4e-14	GH109
2049021784	PBDCA2_337670	NP_631079.1	73.6	1e-13	GH87
2049024902	PBDCA2_400810	ACL69175.1	142	2e-34	GH94
2049026544	PBDCA2_434640	XP_325455.1	84.7	1e-16	GH71
2049026739	PBDCA2_439890	ABJ83668.1	84.3	6e-17	GH3
2049027803	PBDCA2_458820	ACB75560.1	453	1e-126	GH106/CE15
2049028832	PBDCA2_486330	BAD76187.1	171	4e-43	GH38
2049029961	PBDCA2_506370	ACG77768.1	90.5	1e-18	GH23
2049030377	PBDCA2_517640	NP_864910.1	90.1	2e-18	GH43
2049030441	PBDCA2_519260	ACI99657.1	183	8e-47	GH13
2049032143	PBDCA2_554880	BAA01368.1	157	5e-39	GH13
2049033203	PBDCA2_573350	ABE37196.1	1027	0	GH94/GT84
2049037730	PBDCA2_674130	ABQ07113.1	78.6	4e-15	GH78
2049038408	PBDCA2_686230	ACK41548.1	65.5	4e-11	GH3
2049040570	PBDCA2_730370	ACL18141.1	232	2e-61	GH18
2049049379	PBDCA2_917400	ABR38217.1	464	2e-130	GH43
2049053235	PBDCA2_1001200	NP_810694.1	228	7e-60	GH43
2049055037	PBDCA2_1039600	BAF87299.1	152	3e-37	GH5
2049060729	PBDCA2_1163180	ABX42251.1	92	3e-19	GH87
2049060959	PBDCA2_1169220	ABN53393.1	191	5e-49	GH13
2049061536	PBDCA2_1179290	CAK09291.1	79.3	3e-15	GH42
2049061924	PBDCA2_1185720	ACM55520.1	121	1e-27	GH94
2049062569	PBDCA2_1203260	EAA63395.1	82.4	3e-16	GH2
2049062729	PBDCA2_1207530	BAF44076.1	104	6e-23	GH96
2049067141	PBDCA2_1296050	CAX83969.1	598	1e-170	GH1
2049075087	PBDCA2_1467980	ACJ53394.1	135	4e-32	GH29
2049076253	PBDCA2_1489060	ABR44774.1	1020	0	GH3
2049081962	PBDCA2_1612640	ACR30884.1	274	8e-74	GH31
2049083734	PBDCA2_1650060	ACB76240.1	109	3e-24	GH35
2049085373	PBDCA2_1684260	ABJ81207.1	89.4	2e-18	GH33
2049087947	PBDCA2_1743200	AAK19890.1	77.8	7e-15	GH26
2049093484	PBDCA2_1859970	ABF51909.1	121	6e-28	GH97
2049094449	PBDCA2_1876260	ABJ86506.1	69.7	4e-12	GH78
2049100856	PBDCA2_2015790	ABX42304.1	135	3e-32	GH36
2049102079	PBDCA2_2040690	EAR16068.1	71.6	5e-13	GH109
2049102595	PBDCA2_2053520	ABN51453.1	66.6	2e-11	GH1
2049104945	PBDCA2_2098200	ACR74768.1	73.9	3e-13	GH53
2049108546	PBDCA2_2174000	BAH05588.1	303	3e-82	GH94/GT84
2049110773	PBDCA2_2223230	ACM59377.1	65.9	4e-11	GH2
2049114218	PBDCA2_2294890	CAK06242.1	224	6e-59	GH13
2049115183	PBDCA2_2319460	CAM31780.1	116	1e-26	GH65
2049121469	PBDCA2_2447750	NP_612844.1	82.8	4e-16	GH24
2049123982	PBDCA2_2504700	ACI18700.1	150	8e-37	GH1
2049125534	PBDCA2_2536910	CAO99379.1	191	4e-49	GH24
2049125984	PBDCA2_2548600	ABX02671.1	130	8e-31	GH29
2049126954	PBDCA2_2566170	ACI57054.1	209	3e-54	GH2
2049128473	PBDCA2_2597160	AAA23230.1	197	1e-50	GH5
2049129820	PBDCA2_2627800	ABQ06886.1	87.4	8e-18	GH43
2049136507	PBDCA2_2772920	EAA62552.1	94.7	6e-20	GH92
2049138335	PBDCA2_2812070	NP_638236.1	82.8	2e-16	GH29
2049138591	PBDCA2_2816340	ABG41938.1	96.3	2e-20	GH103
2049139747	PBDCA2_2839930	ABG58065.1	87.8	9e-18	GH9
2049143440	PBDCA2_2917000	ABF40487.1	129	2e-30	GH13
2049144505	PBDCA2_2936110	ABC45027.1	88.6	3e-17	GH3
2049144954	PBDCA2_2948150	ABN52453.1	129	2e-30	GH94/GT84
2049145855	PBDCA2_2969230	ABJ81713.1	117	9e-27	GH50
2049146370	PBDCA2_2975850	ACI92730.1	83.2	4e-16	GH19
2049146466	PBDCA2_2978440	ABJ86506.1	132	6e-31	GH78
2049147267	PBDCA2_3000100	ABP66002.1	94.4	7e-20	GH28
2049148971	PBDCA2_3036220	ABF40690.1	174	5e-44	GH5
2049149389	PBDCA2_3045380	EAU86933.1	73.6	1e-13	LDA1
2049151153	PBDCA2_3083790	ABI34800.1	157	5e-39	GH51
2049152474	PBDCA2_3110170	NP_851452.1	113	2e-25	GH3
2049153668	PBDCA2_3132300	NP_811592.1	97.4	2e-20	GH2
2049159020	PBDCA2_3245890	ACI18700.1	100	2e-21	GH1
2049161778	PBDCA2_3309010	NP_421607.1	137	7e-33	GH67
2049162261	PBDCA2_3314950	ABN53021.1	66.6	2e-11	GH18
2049162972	PBDCA2_3331760	ACR74768.1	66.2	3e-11	GH53
2049165191	PBDCA2_3381290	BAF39209.1	66.2	2e-11	GH43
2049166000	PBDCA2_3393450	NP_813579.1	317	3e-86	GH53
2049167770	PBDCA2_3431060	BAD02898.1	72	3e-12	GH73
2049170185	PBDCA2_3484660	ABX36088.1	192	2e-49	GH19
2049171897	PBDCA2_3520900	ACA15655.1	129	2e-30	GH13
2049172412	PBDCA2_3534350	ACB74105.1	110	6e-25	GH3
2049173768	PBDCA2_3561350	ACL77187.1	117	8e-27	GH18
2049174961	PBDCA2_3583850	ABO49983.1	403	3e-112	GH13
2049178143	PBDCA2_3655120	CAN02882.1	79	3e-15	GH13
2049178559	PBDCA2_3659580	ACR74768.1	89	7e-17	GH53
2049182905	PBDCA2_3755590	NP_782983.1	111	8e-25	GH94/GT84
2049189504	PBDCA2_3891920	ACG77820.1	65.1	5e-11	GH16
2049191400	PBDCA2_3932750	NP_809368.1	128	4e-30	GH33
2049191529	PBDCA2_3936100	CAK42323.1	71.2	7e-13	LDA1
2049191819	PBDCA2_3944040	NP_972059.1	148	4e-36	GH36
2049192364	PBDCA2_3957540	ACL69450.1	92.4	3e-19	GH13
2049196195	PBDCA2_4036020	ACL70250.1	70.9	9e-13	GH38
2049196840	PBDCA2_4048540	ABR37832.1	76.3	2e-14	GH29
2049198737	PBDCA2_4089900	NP_822482.1	108	4e-24	GH13
2049200343	PBDCA2_4123230	ACL76655.1	192	5e-49	GH10
2049201015	PBDCA2_4141220	ABY92024.1	90.1	1e-18	GH23
2049201303	PBDCA2_4147450	CAG58981.1	179	1e-45	LO3
2049201753	PBDCA2_4152050	ABU58717.1	432	7e-121	GH77
2049202654	PBDCA2_4174920	ABJ81884.1	114	6e-26	GH94/GT84
2049202847	PBDCA2_4180060	ABX42302.1	156	1e-38	GH13
2049205906	PBDCA2_4242590	ABN53399.1	115	4e-26	GH2
2049206741	PBDCA2_4262220	ABW27791.1	67.4	9e-12	GH1
2049207062	PBDCA2_4265430	NP_813062.1	77.4	8e-15	GH2
2049212052	PBDCA2_4376690	NP_630186.1	85.9	2e-17	GH13
2049213438	PBDCA2_4404920	CAA61884.2	76.6	1e-14	GH16
2049214628	PBDCA2_4426560	ABV33711.1	69.7	2e-12	GH10
2049214660	PBDCA2_4427560	ABQ04980.1	171	9e-43	GH13
2049219176	PBDCA2_4529460	BAB71818.1	88.2	5e-18	GH94
2049221232	PBDCA2_4570480	AAM25787.1	84	1e-16	GH18
2049226543	PBDCA2_4684570	AAF21798.1	91.7	4e-19	GH3
2049233022	PBDCA2_4821360	BAE53202.1	151	7e-37	GH23
2049235559	PBDCA2_4875520	ACA17626.1	135	4e-32	GH23
2049242942	PBDCA2_5029950	ABJ82128.1	87.8	6e-18	GH88
2049245675	PBDCA2_5091010	EAA63677.1	102	2e-22	GH1/GH95
2049248440	PBDCA2_5145510	NP_484334.1	65.9	6e-11	GH5
2049249055	PBDCA2_5161260	ACD24850.1	66.6	2e-11	GH39
2049250019	PBDCA2_5181030	ABQ91109.1	86.3	2e-17	GH94/GT84
2049251782	PBDCA2_5218720	CAA39010.1	90.9	8e-19	GH9
2049253260	PBDCA2_5253440	AAX16367.1	115	4e-26	GH16
2049253453	PBDCA2_5255520	ABR35882.1	107	7e-24	GH3
2049254673	PBDCA2_5281820	BAG21593.1	83.6	1e-16	GH16
2049255188	PBDCA2_5292990	NP_810694.1	97.4	8e-21	GH43
2049259152	PBDCA2_5373090	NP_421597.1	67.8	6e-12	GH35
2049260791	PBDCA2_5409200	ACL74541.1	99	3e-21	GH10
2049261728	PBDCA2_5430170	ABR33414.1	134	1e-31	GH42
2049267934	PBDCA2_5561010	NP_792920.1	95.9	2e-20	GH13
2049267998	PBDCA2_5561650	ABG87808.1	97.1	1e-20	GH38
2049269894	PBDCA2_5600380	ACD52713.1	94.4	5e-19	GH73
2049271373	PBDCA2_5635600	NP_822252.1	87.8	6e-18	GH27
2049272407	PBDCA2_5656360	ABF43242.1	149	3e-36	GH2
2049273662	PBDCA2_5680120	ABR38224.1	68.2	2e-11	GH105
2049274401	PBDCA2_5699670	ACD83802.1	116	2e-26	GH3
2049277918	PBDCA2_5774120	NP_127210.1	89.4	2e-18	GH35
2049286032	PBDCA2_5942720	ABA04208.1	530	4e-150	GH13
2049286578	PBDCA2_5956730	ACJ72869.1	217	1e-56	LO2
2049289995	PBDCA2_6027760	BAA12826.1	149	3e-36	GH5
2049290699	PBDCA2_6046610	ACI19412.1	65.9	3e-11	GH31
2049292080	PBDCA2_6074580	CAN60684.1	67.8	1e-11	GH18
2049293298	PBDCA2_6097010	pir||A38084	192	1e-48	LDA5
2049293748	PBDCA2_6108940	ABF86306.1	133	2e-31	GH13
2049297485	PBDCA2_6189260	ACR74768.1	66.2	3e-11	GH53
2049299057	PBDCA2_6221570	BAH39526.1	68.6	7e-12	GH109
2049299281	PBDCA2_6227830	AAV98258.1	173	1e-43	GH43
2049303978	PBDCA2_6324250	ABA56022.1	70.5	6e-12	GH12
2049306074	PBDCA2_6370820	ABR43536.1	171	4e-43	GH78
2049309714	PBDCA2_6449250	ABX41272.1	232	3e-61	GH113
2049311390	PBDCA2_6484670	ACM40011.1	115	2e-26	GH88
2049312836	PBDCA2_6513770	CAJ68298.1	72.4	5e-13	GH18
2049313348	PBDCA2_6526910	ACR12748.1	214	9e-56	GH15
2049316628	PBDCA2_6595880	CAP85801.1	85.9	5e-17	LO3
2049318242	PBDCA2_6629390	ABC20110.1	236	2e-62	GH57
2049320427	PBDCA2_6677820	ACN28438.1	125	4e-29	GH28
2049320619	PBDCA2_6683110	ABU59612.1	88.6	4e-18	GH36
2049322355	PBDCA2_6720280	CAN65674.1	124	1e-28	GH28
2049324580	PBDCA2_6769620	ABR37863.1	120	1e-27	GH97
2049325737	PBDCA2_6791230	CAN65674.1	83.6	1e-16	GH28
2049326348	PBDCA2_6807380	ABR43077.1	131	4e-31	GH78
2049327184	PBDCA2_6820600	CAG58981.1	82.8	3e-16	LO3
2049329050	PBDCA2_6859730	ACM61450.1	215	5e-56	GH105
2049329210	PBDCA2_6863760	ABW17626.1	68.2	5e-12	GH39
2049329370	PBDCA2_6868130	ABC45027.1	70.1	3e-12	GH3
2049329819	PBDCA2_6880040	ABR44148.1	94.4	8e-20	GH95
2049330916	PBDCA2_6899580	AAH49316.1	85.5	5e-17	GH59
2049335442	PBDCA2_6998320	ACB77359.1	86.3	2e-17	GH2
2049336373	PBDCA2_7016040	EAA62552.1	67.4	1e-11	GH92
2049338980	PBDCA2_7074110	ABR49663.1	83.2	2e-16	GH94/GT84
2049339398	PBDCA2_7078460	CAP85801.1	70.1	1e-11	LO3
2049341357	PBDCA2_7121580	ABG53928.1	127	1e-29	GH13
2049343124	PBDCA2_7159210	BAF59037.1	165	3e-41	GH23
2049360098	PBDCA2_7525970	ACH37845.1	152	2e-37	GH13
2049360484	PBDCA2_7530160	ABQ07113.1	69.7	2e-12	GH78
2049360805	PBDCA2_7535370	ABN54008.1	129	4e-30	GH16
2049365401	PBDCA2_7638070	AAG59608.1	87	1e-17	GH9
2049365433	PBDCA2_7638820	ABF43705.1	113	1e-25	GH57
2049366494	PBDCA2_7657870	ACL77529.1	148	7e-36	GH43
2049373034	PBDCA2_7794360	CAG58981.1	175	3e-43	LO3
2049373872	PBDCA2_7816130	AAW97246.1	127	1e-29	GH18
2049374032	PBDCA2_7820290	ABF40487.1	103	9e-23	GH13
2049374995	PBDCA2_7836280	EAA62552.1	72	8e-13	GH92
2049379979	PBDCA2_7944260	ABZ70907.1	102	2e-22	GH15
2049380236	PBDCA2_7948430	EAA62552.1	83.6	4e-16	GH92
2049382385	PBDCA2_7995970	CAK42323.1	85.5	6e-17	LDA1
2049382577	PBDCA2_8001050	NP_864910.1	70.5	2e-12	GH43
2049382705	PBDCA2_8004510	ABS62456.1	190	1e-48	GH5
2049384315	PBDCA2_8038140	NP_420565.1	135	3e-32	GH30
2049389210	PBDCA2_8140070	NP_624665.1	106	2e-23	GH95
2049397166	PBDCA2_8314220	ABX42243.1	195	2e-50	GH65
2049397779	PBDCA2_8324030	ABN52453.1	77	1e-14	GH94/GT84
2049398134	PBDCA2_8330730	ABU59093.1	77	2e-14	GH39
2049400751	PBDCA2_8390190	ABY92024.1	106	2e-23	GH23
2049401977	PBDCA2_8413180	XP_331443.1	91.7	9e-19	GH93
2049403557	PBDCA2_8445610	CAH06053.1	98.6	4e-21	GH3
2049409968	PBDCA2_8586170	ACI18860.1	149	2e-36	GH94
2049411737	PBDCA2_8623740	CAN96629.1	163	8e-41	GH94
2049412640	PBDCA2_8638290	CAJ85791.1	119	3e-27	LDA6
2049415301	PBDCA2_8698910	ABD05156.1	77.8	6e-15	GH4
2049416037	PBDCA2_8709930	ACL25580.1	77.4	1e-14	GH13
2049418999	PBDCA2_8775920	AAD23585.1	85.1	5e-17	GH36
2049419674	PBDCA2_8788100	ABG58238.1	85.1	5e-17	GH9
2049420735	PBDCA2_8813600	ABK18630.1	110	9e-25	GH13
2049423786	PBDCA2_8879390	ABF41692.1	133	1e-31	GH23
2049426456	PBDCA2_8932250	ABG58430.1	201	2e-51	GH74
2049428902	PBDCA2_8987530	ABW39321.1	65.9	3e-11	GH9
2049434013	PBDCA2_9095330	NP_630514.1	65.1	7e-11	GH92
2049434431	PBDCA2_9106460	BAD76703.1	120	6e-28	GH18
2049436713	PBDCA2_9154980	ACL75113.1	173	1e-43	GH9
2049440763	PBDCA2_9237420	ACL21215.1	92.8	3e-19	GH13/GH77
2049442016	PBDCA2_9267870	CAD60605.1	72.4	3e-13	LDA6
2049442660	PBDCA2_9278230	ABJ88303.1	261	4e-70	GH36
2049446275	PBDCA2_9354930	ACC79009.1	64.7	7e-11	GH1
2049452593	PBDCA2_9495280	ABN54008.1	64.7	6e-11	GH16
2049453717	PBDCA2_9516000	NP_623660.1	92.4	3e-19	GH23
2049458599	PBDCA2_9618670	ACR13804.1	182	5e-46	GH39
2049459824	PBDCA2_9648880	ABO58300.1	97.4	7e-21	GH37
2049459888	PBDCA2_9649520	CAP70495.1	75.9	2e-14	GH5
2049460854	PBDCA2_9669190	ABA79685.1	65.1	8e-11	GH16
2049465617	PBDCA2_9767830	ABG02418.1	65.5	7e-11	GH18
2049466739	PBDCA2_9797550	ABJ81884.1	89.4	2e-18	GH94/GT84
2049468897	PBDCA2_9839450	CAH06062.1	69.3	2e-12	GH38
2049469217	PBDCA2_9844850	CAN65674.1	140	2e-33	GH28
2049470278	PBDCA2_9872510	CAJ69458.1	79	3e-15	GH38
2049472881	PBDCA2_9923140	EAA61743.1	121	1e-27	GH31
2049473299	PBDCA2_9934360	ABD83039.1	113	1e-25	GH108
2049475232	PBDCA2_9977060	ACI20861.1	155	2e-38	GH13
2049477713	PBDCA2_10028170	ABR42311.1	117	5e-27	GH97
2049480936	PBDCA2_10099940	BAF59766.1	75.9	3e-14	GH77
2049485061	PBDCA2_10182290	NP_693833.1	116	2e-25	GH73
2049485898	PBDCA2_10204650	ABQ06533.1	160	1e-39	GH43
2049486058	PBDCA2_10208480	ACL77698.1	140	1e-33	GH3
2049486444	PBDCA2_10216140	ACK83779.1	154	6e-38	GH13
2049491114	PBDCA2_10313720	CAN65674.1	159	2e-39	GH28
2049493395	PBDCA2_10365760	CAQ00988.1	145	2e-35	GH3
2049494067	PBDCA2_10373850	CAN93214.1	86.3	7e-17	GH1
2049494840	PBDCA2_10394590	ABQ66886.1	76.6	1e-14	GH23
2049495160	PBDCA2_10402820	AAB95491.2	164	5e-41	GH94
2049496065	PBDCA2_10417580	ABZ71261.1	239	2e-63	GH2
2049496905	PBDCA2_10440120	ACB74647.1	166	2e-41	GH39
2049497578	PBDCA2_10449070	ACR74768.1	87.4	9e-17	GH53
2049498382	PBDCA2_10470170	ABD26384.1	142	2e-34	GH103
2049498446	PBDCA2_10472010	ACK49196.1	215	3e-56	GH13
2049502639	PBDCA2_10559200	ABR48219.1	73.6	1e-13	GH23
2049503356	PBDCA2_10573520	BAA32430.1	240	1e-63	GH48
2049506739	PBDCA2_10644610	ABJ85402.1	162	3e-40	GH43
2049508473	PBDCA2_10681960	ABQ07185.1	119	3e-27	GH16
2049514760	PBDCA2_10820020	ABY95558.1	129	2e-30	GH1
2049515790	PBDCA2_10837670	ACR14401.1	110	2e-24	GH5
2049516368	PBDCA2_10852920	ABN53021.1	65.9	2e-11	GH18
2049517500	PBDCA2_10873260	CAK08282.1	91.3	1e-18	GH2
2049517758	PBDCA2_10880300	ABK97667.1	145	5e-35	GH57
2049520914	PBDCA2_10945070	ABN53343.1	117	2e-26	GH43/GH5
2049522552	PBDCA2_10980280	ABW09895.1	97.4	8e-21	GH78
2049523292	PBDCA2_10998250	ABN44552.1	106	3e-23	GH20
2049527577	PBDCA2_11090540	NP_864910.1	77	1e-14	GH43
2049528416	PBDCA2_11105270	ACJ28445.1	95.1	7e-20	GH109
2049528545	PBDCA2_11108710	ACO33333.1	147	7e-36	GH55
2049529445	PBDCA2_11129290	NP_638508.1	74.7	5e-14	GH2
2049531921	PBDCA2_11179520	CAL28871.1	113	2e-25	GH2
2049532563	PBDCA2_11196770	ABI68406.1	108	3e-24	GH26
2049534106	PBDCA2_11228070	ACB75560.1	128	4e-30	GH106/CE15
2049538157	PBDCA2_11316150	AAM25311.1	124	5e-29	GH94/GT84
2049540309	PBDCA2_11357620	CAJ75048.1	71.2	7e-13	GH13
2049540897	PBDCA2_11370240	ABL11223.1	295	4e-80	GH44
2049541925	PBDCA2_11393890	ABU57961.1	80.1	1e-15	GH94/GT84
2049542149	PBDCA2_11396130	NP_812876.1	73.2	2e-13	GH92
2049543752	PBDCA2_11432320	ABN57195.1	112	2e-25	GH13
2049545295	PBDCA2_11467750	ACJ34628.1	129	2e-30	GH13
2049550219	PBDCA2_11570660	BAC54958.1	244	7e-65	GH31
2049550925	PBDCA2_11584160	ABJ81233.1	76.6	2e-14	GH13
2049552245	PBDCA2_11615180	ABZ73922.1	112	3e-25	GH16
2049552374	PBDCA2_11618200	ABD26035.1	140	1e-33	GH18/GT2/CE4
2049552502	PBDCA2_11619660	CAD48309.1	163	1e-40	GH3
2049552790	PBDCA2_11622540	ACH37164.1	86.7	2e-17	GH57
2049552950	PBDCA2_11624560	BAG80626.1	75.5	5e-14	GH23
2049553175	PBDCA2_11630250	CAH00655.1	85.1	4e-17	LO3
2049555109	PBDCA2_11671810	ACL15994.1	241	6e-64	GH94/GT84
2049557824	PBDCA2_11732790	ACL74542.1	89.4	2e-18	GH2
2049564575	PBDCA2_11873930	ABS74936.1	215	4e-56	GH51
2049568559	PBDCA2_11960240	ACB77556.1	74.7	5e-14	GH95
2049572028	PBDCA2_12034850	NP_243769.1	69.7	2e-12	GH13
2049572159	PBDCA2_12036390	ACG80041.1	76.3	2e-14	GH1
2049576281	PBDCA2_12120250	AAL27306.1	99.8	2e-21	GH35
2049578404	PBDCA2_12167760	NP_864910.1	69.3	4e-12	GH43
2049582643	PBDCA2_12261050	ABP71312.1	73.9	1e-13	GH16
2049583671	PBDCA2_12279030	ABJ84616.1	245	3e-65	GH51
2049586886	PBDCA2_12345410	BAE62106.1	87.4	7e-17	LO3
2049591771	PBDCA2_12453720	ABJ85174.1	145	3e-35	GH29
2049596123	PBDCA2_12544630	NP_623886.1	168	7e-42	GH30
2049598338	PBDCA2_12594300	ABH78164.1	254	3e-68	GH37
2049598857	PBDCA2_12604450	CAN65674.1	99.8	2e-21	GH28
2049601403	PBDCA2_12656200	ACM35559.1	88.2	5e-18	GH13
2049607771	PBDCA2_12794420	ABS69644.1	137	8e-33	GH17/GT2
2049610249	PBDCA2_12845300	CAD72460.1	193	2e-49	GH57
2049618861	PBDCA2_13026500	AAD52097.1	74.7	3e-13	GH18
2049619310	PBDCA2_13038120	CAG81278.1	93.6	2e-19	LO3
2049619771	PBDCA2_13050080	ABF41808.1	168	3e-42	GH15
2049620255	PBDCA2_13060070	ABQ06127.1	84.7	5e-17	GH27
2049621316	PBDCA2_13082450	CAN91123.1	119	4e-27	GH5
2049621988	PBDCA2_13097620	ABX41261.1	83.6	1e-16	GH43
2049623626	PBDCA2_13133780	AAQ20920.1	143	1e-34	GH94
2049623757	PBDCA2_13135090	BAH42045.1	79.7	2e-15	GH18
2049624625	PBDCA2_13151750	ACL69174.1	81.6	7e-16	GH81
2049631662	PBDCA2_13301070	ABX03537.1	112	6e-25	GH5
2049632046	PBDCA2_13311230	CAL79478.1	128	5e-30	GH15
2049635169	PBDCA2_13376220	CAP85801.1	126	2e-29	LO3
2049636036	PBDCA2_13398440	ABG60100.1	84	1e-16	GH8
2049636654	PBDCA2_13405960	ABC45027.1	68.6	9e-12	GH3
2049636753	PBDCA2_13408530	CAD42489.1	232	4e-61	GH5
2049643051	PBDCA2_13548220	AAQ31849.1	148	4e-36	GH26
2049643275	PBDCA2_13551110	CAI79477.1	107	6e-24	GH10
2049644114	PBDCA2_13566900	NP_607527.1	110	1e-24	GH73
2049644887	PBDCA2_13587400	CAL66680.1	70.5	1e-12	GH29
2049645207	PBDCA2_13590610	ACA72633.1	103	2e-22	GH94/GT84
2049645752	PBDCA2_13601480	AAB42155.1	189	3e-48	GH9
2049653086	PBDCA2_13758340	ABD80052.1	144	1e-34	GH97
2049653727	PBDCA2_13775070	ACI19887.1	99	3e-21	GH26
2049656464	PBDCA2_13828920	ABX42556.1	75.1	4e-14	GH29
2049660014	PBDCA2_13904350	ABR47117.1	87.8	6e-18	GH105
2049664556	PBDCA2_14004270	BAF87299.1	95.5	4e-20	GH5
2049665875	PBDCA2_14032420	CAN65674.1	132	2e-31	GH28
2049666163	PBDCA2_14039930	ACL76905.1	96.3	2e-20	GH94/GT84
2049666902	PBDCA2_14050070	ABZ73922.1	97.8	2e-20	GH16
2049671577	PBDCA2_14155900	ABX42168.1	65.1	4e-11	GH18
2049672861	PBDCA2_14180320	NP_812984.1	231	8e-61	GH92
2049676309	PBDCA2_14252520	ABY40380.1	97.8	1e-20	GH18
2049681108	PBDCA2_14351540	ABN52453.1	274	2e-73	GH94/GT84
2049687467	PBDCA2_14491870	ACL55887.1	83.2	2e-16	GH16
2049689524	PBDCA2_14535620	ABA59430.1	86.7	2e-17	GH23
2049693835	PBDCA2_14623720	CAA61884.2	68.6	4e-12	GH16
2049695513	PBDCA2_14658580	ACL24977.1	184	4e-47	GH13
2049696477	PBDCA2_14684180	CAE79132.1	174	7e-44	GH13
2049696605	PBDCA2_14687390	NP_782983.1	72	3e-13	GH94/GT84
2049698532	PBDCA2_14726840	ABZ71539.1	95.9	3e-20	GH27
2049713937	PBDCA2_15053660	ACF03370.1	293	1e-79	GH103
2049714995	PBDCA2_15072460	BAE51343.1	832	0	GH23
2049717159	PBDCA2_15119200	ABY94276.1	211	4e-55	GH38
2049717607	PBDCA2_15131520	ABQ06129.1	131	6e-31	GH95
2049720595	PBDCA2_15191920	ABS62456.1	104	7e-23	GH5
2049724130	PBDCA2_15267070	BAH40825.1	76.6	2e-14	GH94/GT84
2049725156	PBDCA2_15294170	ACQ82079.1	112	2e-25	GH31
2049726761	PBDCA2_15327480	CAY02964.1	107	9e-24	GH13
2049727727	PBDCA2_15343370	ABA89283.1	115	6e-26	GH23
2049729881	PBDCA2_15390890	ACA43820.1	110	9e-25	GH94/GT84
2049730205	PBDCA2_15399600	ACJ72869.1	80.9	8e-16	LO2
2049731203	PBDCA2_15416500	ACI49189.1	66.6	2e-11	GH13
2049733808	PBDCA2_15476080	ABJ86506.1	69.3	2e-12	GH78
2049734065	PBDCA2_15482630	EAU88011.1	66.6	1e-11	LDA1
2049736991	PBDCA2_15540860	NP_810691.1	81.3	7e-16	GH3
2049737631	PBDCA2_15558150	CAJ73823.1	67	1e-11	GH13
2049742814	PBDCA2_15666510	CAN65674.1	124	8e-29	GH28
2049743230	PBDCA2_15676740	ABS23659.1	66.6	2e-11	GH73
2049743326	PBDCA2_15677700	ACG80113.1	129	2e-30	GH94/GT84
2049744453	PBDCA2_15699440	ACR74768.1	66.6	2e-11	GH53
2049745964	PBDCA2_15729610	BAB64835.1	82	4e-16	GH8
2049748891	PBDCA2_15794110	ABR62944.1	80.1	2e-15	GH4
2049749340	PBDCA2_15801530	CAG58981.1	72.8	2e-13	LO3
2049751175	PBDCA2_15841750	CAD48308.1	249	4e-66	GH39
2049759223	PBDCA2_16016760	ACR12748.1	127	9e-30	GH15
2049763766	PBDCA2_16108930	BAA94842.1	248	6e-66	GH13
2049764602	PBDCA2_16131230	ACA17291.1	97.4	8e-21	GH65
2049765632	PBDCA2_16148690	NP_868803.1	156	2e-38	GH13
2049772691	PBDCA2_16298350	ABJ84437.1	67.8	6e-12	GH29
2049773272	PBDCA2_16313800	ABD26098.1	182	3e-46	GH13
2049780657	PBDCA2_16471920	ABJ83595.1	65.9	3e-11	GH9
2049788688	PBDCA2_16638060	ACR74768.1	75.9	3e-14	GH53
2049789744	PBDCA2_16664890	ACP25531.1	103	2e-22	GH43
2049800654	PBDCA2_16895390	NP_866909.1	129	2e-30	GH29
2049803099	PBDCA2_16944130	ABR43180.1	158	9e-39	GH2
2049806394	PBDCA2_17013170	ACL71075.1	265	7e-71	GH4
2049808358	PBDCA2_17054650	ACB74645.1	130	2e-30	GH105
2049810903	PBDCA2_17112940	ACB74394.1	145	3e-35	GH13
2049816598	PBDCA2_17234810	ABX42304.1	145	3e-35	GH36
2049818245	PBDCA2_17269180	ABP66714.1	119	2e-27	GH3
2049818597	PBDCA2_17274730	ACJ76249.1	112	2e-25	GH31
2049820042	PBDCA2_17306740	ACJ72869.1	162	3e-40	LO2
2049827327	PBDCA2_17461470	NP_015510.1	154	5e-38	GH13
2049835542	PBDCA2_17631620	CAZ29389.1	72	6e-13	GH99
2049838951	PBDCA2_17704480	CAN65674.1	210	2e-54	GH28
2049842299	PBDCA2_17774670	ACA87918.1	229	2e-59	GH110
2049843198	PBDCA2_17798520	CAG85768.1	105	4e-23	LO3
2049845966	PBDCA2_17852250	ABG03293.1	73.2	2e-13	GH13
2049846673	PBDCA2_17870980	ABZ73922.1	92.8	3e-19	GH16
2049848283	PBDCA2_17904420	ABQ66849.1	246	2e-65	GH103
2049852854	PBDCA2_18001350	ACL77529.1	93.2	2e-19	GH43
2049853307	PBDCA2_18009730	ABR35882.1	286	3e-77	GH3
2049853467	PBDCA2_18013850	ACJ72869.1	223	1e-58	LO2
2049854045	PBDCA2_18029120	ABM12084.1	147	7e-36	GH38
2049857749	PBDCA2_18108870	ABP66003.1	145	3e-35	GH2
2049865716	PBDCA2_18273990	ACI19118.1	140	1e-33	GH5
2049865910	PBDCA2_18279090	ABJ83627.1	244	1e-64	GH30
2049868585	PBDCA2_18339580	ACB76504.1	95.1	4e-20	GH43
2049869579	PBDCA2_18357280	ABR35984.1	66.6	2e-11	GH32
2049870446	PBDCA2_18378380	ABP45478.1	66.6	2e-11	GH18/GH5
2049877095	PBDCA2_18518580	NP_864051.1	82.8	3e-16	GH78
2049878125	PBDCA2_18536600	ABF52484.1	97.4	9e-21	GH25
2049878959	PBDCA2_18558440	NP_624805.1	132	3e-31	GH78
2049879892	PBDCA2_18573850	CAH09292.1	79.7	2e-15	GH20
2049882858	PBDCA2_18642310	ABQ04440.1	133	1e-31	GH13
2049884730	PBDCA2_18681810	ABJ83069.1	108	3e-24	GH32
2049886472	PBDCA2_18719140	ABN52453.1	155	2e-38	GH94/GT84
2049888829	PBDCA2_18763690	ACI16879.1	87.8	3e-17	GH23
2049891496	PBDCA2_18824360	ACI92357.1	112	3e-25	GH23
2049892979	PBDCA2_18853720	ACE83242.1	119	4e-27	GH5
2049897125	PBDCA2_18945850	ACI11213.1	128	3e-30	GH78
2049899431	PBDCA2_18989950	ABK60508.1	69.3	2e-12	GH18
2049008059	PBDCA2_40940	CAJ85791.1	104	1e-22	LDA6
2049008091	PBDCA2_41790	CAN65674.1	192	5e-49	GH28
2049008187	PBDCA2_44430	CAH08593.1	125	5e-29	GH51
2049013438	PBDCA2_155000	ABR38993.1	327	4e-89	GH105
2049024198	PBDCA2_382230	ABY95850.1	127	4e-29	GH23
2049024326	PBDCA2_385260	ABA23357.1	161	9e-40	GH65
[truncated: 11,439 more rows]
